# Supplementary material
Source: publisher figshare collection journal article supplement (https://karger.figshare.com/articles/dataset/_/5841519)
Supplement: Supplementary file 1 [file 1]

Archive with 11 entries (11 files):
- 486347sm_7.pdf
- 486347sm_2.pdf
- 486347sm_9.pdf
- 486347sm_8.pdf
- 486347sm_6.pdf
- 486347sm_5.pdf
- 486347sm_10.pdf
- 486347sm_1.pdf
- 486347sm_3.pdf
- 486347sm_4.pdf
- 486347sm_11.pdf
