# Supplementary material
Source: publisher figshare collection journal article supplement (https://karger.figshare.com/articles/dataset/_/5841519)
Supplement: Supplementary file 1 [file 1 › 486347sm_1.pdf]

**Supplemental Table     Mobile physical activity outcomes**

| Therapeutic Area                                                              | Technology                                                  | Position of device                                       | Epoch         | Study design                 | Type of clinical study | Other mobile outcomes | Other standard outcome assessment                                                                                                                                 | Use of mobile outcomes                                       | Objectives                                                                                                                                                                                                                                                                                                                                      | Source             |
|-------------------------------------------------------------------------------|-------------------------------------------------------------|----------------------------------------------------------|---------------|------------------------------|------------------------|-----------------------|-------------------------------------------------------------------------------------------------------------------------------------------------------------------|--------------------------------------------------------------|-------------------------------------------------------------------------------------------------------------------------------------------------------------------------------------------------------------------------------------------------------------------------------------------------------------------------------------------------|--------------------|
| Arthritis (Osteoarthritis)                                                    | Inertial sensor (Actiwatch-Score)                           | Not specified                                            | 15 seconds    | Interventional (RCT)         | Quality of life        | NA                    | Pain (PRO, ClinRO)<br>Fatigue (PRO, ClinRO)<br>Mobility (PerFO)<br>General health history (PRO)<br>Physical activity (PerFO)<br>Psychosocial (PRO, ClinRO)        | Secondary endpoint                                           | To examine the effectiveness of a tailored activity pacing intervention on fatigue, pain, and physical function, to determine if increased arthritis self-efficacy post intervention is related to improvements in symptom severity and function, and to evaluate the effect of tailored activity pacing on PA for adults with knee and hip OA. | Murphy 2011 [1]    |
| Arthritis (Osteoarthritis)<br>Orthopedics (Arthroscopic partial meniscectomy) | Inertial sensor (Actigraph 7164)                            | Waist                                                    | Not specified | Observational (Case control) | Quality of life        | NA                    | Cardiometabolic and anthropometric measures (ClinRO)<br>Mobility (PRO, ClinRO)                                                                                    | Co-Prim Endpoint                                             | To compare physical activity levels, subject-reported function, and knee strength in 21 arthroscopic partial meniscectomy patients 3 months post-surgery with 21 healthy controls, matched at the cohort level for age, gender and BMI.                                                                                                         | Ilich 2012 [2]     |
| Arthritis (Rheumatoid Arthritis)                                              | Inertial sensor (Actigraph Mini-Motionlogger)               | Wrist (Non-dominant)                                     | Not specified | Observational (Case control) | Quality of life        | NA                    | Physical activity (PRO)<br>Psychosocial (PRO)<br>Sleep (PRO)                                                                                                      | Co-Prim Endpoint                                             | To investigate physical activity measured by an actigraph in patients with RA and in healthy individuals and to investigate the association between actigraphic data and self-reported physical function.                                                                                                                                       | Hashimoto 2015 [3] |
| Cancer (Breast cancer)                                                        | Inertial sensor (Actigraph Model GT1M)                      | Waist (Non-Dominant Hip)                                 | 60 seconds    | Interventional (RCT)         | Quality of life        | NA                    | Cardiometabolic and anthropometric measures (PRO)<br>Fatigue (PRO)<br>General health history (PRO)<br>Physical activity (PRO)<br>Psychosocial (PRO, ClinRO)       | Exploratory endpoint                                         | To longitudinally test a model examining the role of self-efficacy and depression as potential mediators of the relationship between PA and fatigue in a sample of breast cancer survivors using both self-report and objective measures of PA.                                                                                                 | Phillips 2013 [4]  |
| Cancer (Breast cancer)                                                        | Inertial sensor (ActiGraph GT3X+ accelerometer, Fitbit One) | Various locations (Waistband , bra, pants pocket), Waist | Not specified | Interventional (RCT)         | Quality of life        | NA                    | Cardiometabolic and anthropometric measures (ClinRO, Biomarkers)<br>Glucose (Biomarkers)<br>Psychosocial (PRO)<br>Fatigue (PRO)<br>General health history (ObsRO) | Exploratory endpoint<br>To measure adherence to intervention | To examine the effects of a 3-month physical activity intervention compared to a wait list control arm on neuropsychological outcomes and subjective cognitive concerns in breast cancer survivors.                                                                                                                                             | Hartman 2015 [5]   |

|                                                      |                                                                                                                 |                                     |               |                              |                  |    |                                                                                                                                                            |                      |                                                                                                                                                                                                                                                               |                       |
|------------------------------------------------------|-----------------------------------------------------------------------------------------------------------------|-------------------------------------|---------------|------------------------------|------------------|----|------------------------------------------------------------------------------------------------------------------------------------------------------------|----------------------|---------------------------------------------------------------------------------------------------------------------------------------------------------------------------------------------------------------------------------------------------------------|-----------------------|
| Cancer (Lung cancer)                                 | Inertial sensor (Doorwerth AM101)                                                                               | Waist (Over the Hip)                | Not specified | Interventional (RCT)         | Quality of life  | NA | Adherence (PRO, Biomarkers)<br>General health history (PRO, ClinRO)<br>Mobility (PRO, ClinRO, PerFO)<br>Psychosocial (PRO, ClinRO)                         | Co-Prim Endpoint     | To investigate effects of an oral nutritional supplement containing n-3 polyunsaturated fatty on quality of life, performance status, handgrip strength and physical activity in patients with non-small cell lung cancer undergoing multimodality treatment. | van der Meij 2013 [6] |
| Cardiology                                           | Inertial sensor (open access PA dataset available from National Health and Nutrition Examination Survey 2005-6) | Not specified                       | Not specified | Observational (Cohort study) | Epidemiologic al | NA | Cardiac (Biomarkers)                                                                                                                                       | Co-Prim Endpoint     | To investigate associations between activity regularity and resting systolic blood pressure, as an exemplary well-established cardiovascular risk factor.                                                                                                     | Marschollek 2015 [7]  |
| Cardiology                                           | Inertial sensor (activPAL)                                                                                      | Leg or Foot (Thigh)                 | Not specified | Observational (Cohort study) | Epidemiologic al | NA | Cardiometabolic and anthropometric measures (Biomarkers)                                                                                                   | Exploratory endpoint | To analyse the relationship between objectively measured daily walking duration and cardiovascular Biomarkers of inflammation, cardiac dysfunction and renal impairment.                                                                                      | Klenk 2012 [8]        |
| Cardiology                                           | Inertial sensor (SenseWear™ Mini Armband)                                                                       | Arm                                 | Not specified | Observational (Cohort study) | Epidemiologic al | NA | Physical activity (PerFO)                                                                                                                                  | Co-Prim Endpoint     | To compare sedentary behaviour and the quantity and quality of daily physical activity among older cardiac patients who were at different stages of recovery following a cardiac event.                                                                       | Buijs 2015 [9]        |
| Cardiology (Cognitive Functioning and Heart Failure) | Inertial sensor (Actigraph Model GT1M)                                                                          | Waist (Non-Dominant hip, Right hip) | Not specified | Observational (Cohort study) | Epidemiologic al | NA | Physical activity (PerFO, PRO)<br>Psychosocial (ClinRO)<br>Cardiac (Biomarkers)                                                                            | Exploratory endpoint | To determine if decreased levels of physical activity at baseline would predict worse cognitive function and greater reductions in cerebral perfusion among HF patients.                                                                                      | Alosco 2014 [10]      |
| Cardiology (Congenital Heart Defect)                 | Inertial sensor (Actigraph 7164)                                                                                | Waist (Right hip)                   | 30 seconds    | Observational (Case control) | Quality of life  | NA | Cardiometabolic and anthropometric measures (ObsRO)                                                                                                        | Exploratory endpoint | To objectively evaluate and describe physical activity levels in children with a stable congenital heart defect and compare those levels with children who do not have a congenital heart defect.                                                             | Ewalt 2011 [11]       |
| Cardiology (Coronary Artery Calcification)           | Inertial sensor (ActiGraph GT3X+ accelerometer)                                                                 | Waist (Over the Hip)                | Not specified | Observational (Cohort study) | Epidemiologic al | NA | Cardiometabolic and anthropometric measures ClinRO, Biomarkers)<br>Cardiac (ClinRO, Biomarkers)<br>Glucose (ClinRO, Biomarkers)<br>Physical activity (PRO) | Exploratory endpoint | To determine the relationship between objectively measured physical activity and coronary artery calcium.                                                                                                                                                     | Hamer 2012 [12]       |

|                                        |                                                                               |                                                          |               |                              |                      |    |                                                                                                                                                    |                                        |                                                                                                                                                                                                                                       |                      |
|----------------------------------------|-------------------------------------------------------------------------------|----------------------------------------------------------|---------------|------------------------------|----------------------|----|----------------------------------------------------------------------------------------------------------------------------------------------------|----------------------------------------|---------------------------------------------------------------------------------------------------------------------------------------------------------------------------------------------------------------------------------------|----------------------|
| Cardiology (Coronary Artery Disease)   | Inertial sensor (ActiGraph GT3X+ accelerometer)                               | Waist (Right hip)                                        | 15 seconds    | Observational (Cohort study) | Prevention           | NA | Cardiometabolic and anthropometric measures (ClinRO, Biomarkers)<br>Cardiac (Biomarkers)<br>Glucose (Biomarkers)<br>Physical activity (PerFO, PRO) | Exploratory endpoint                   | To quantify sedentary time in a post-cardiac rehabilitation population and assess association with cardiometabolic risk, independent of MVPA.                                                                                         | Prince 2016 [13]     |
| Cardiology (Dyslipidemia)              | Inertial sensor (Actical accelerometer)                                       | Waist (Over the Hip)                                     | 25 seconds    | Interventional (RCT)         | Quality of life      | NA | Cardiometabolic and anthropometric measures (ClinRO, Biomarkers)<br>Cardiac (Biomarkers)<br>Physical activity (PerFO)                              | Co-Prim Endpoint                       | To determine, among statin naive participants, if overall PA levels as measured by an accelerometer decrease in a treatment group receiving Atorvastatin compared with those in the placebo group.                                    | Panza 2016 [14]      |
| Cardiology (Heart Failure)             | Inertial sensor (Kionix KXUD9-2050)                                           | Waist                                                    | Not specified | Interventional (RCT)         | Quality of life      | NA | Cardiac (PRO, ClinRO), Biomarkers)<br>Physical activity (PerFO)                                                                                    | Primary endpoint<br>Secondary endpoint | To determine whether extended-release isosorbide mononitrate would enhance the daily activity level in patients with heart failure with a preserved ejection fraction, as assessed by patient-worn accelerometers.                    | Redfield 2015 [15]   |
| Cardiology (Intermittent Claudication) | Inertial sensor (DynaPort MoveMonitor)                                        | Base of the Spine, Waist                                 | Not specified | Observational (Cohort study) | Prevention           | NA | Mobility (ClinRO)<br>Physical activity (ClinRO)                                                                                                    | Primary endpoint<br>Secondary endpoint | To investigate the effect of supervised exercise therapy on PA levels and ambulatory activities in patients with intermittent claudication.                                                                                           | Fokkenrood 2015 [16] |
| Cardiology (Intermittent Claudication) | Inertial sensor (DynaPort MoveMonitor)                                        | Base of the Spine, Waist                                 | 100 Hz        | Observational (Case control) | Epidemiologic al     | NA | Mobility (ClinRO, PerFO)<br>Physical activity (ClinRO)<br>Psychosocial (ClinRO)                                                                    | Primary endpoint<br>Secondary endpoint | To quantify, using accelerometer data, daily PA level and energy expenditure of newly diagnosed patients with intermittent claudication and healthy controls. PA outcomes are compared with contemporary public health PA guidelines. | Lauret 2014 [17]     |
| Cardiology (Stroke)                    | Inertial sensor (ActiGraph GT3X+ accelerometer, SenseWear Armband, activPAL3) | Arm (Nonhemip aretic upper), Waist (Nonhemip aretic Hip) | Not specified | Interventional (RCT)         | Treatment (Phase II) | NA | Pain (PRO)<br>Fatigue (PRO)<br>Physical activity (PRO)<br>Sleep (PRO)                                                                              | Secondary endpoint                     | To test the safety, feasibility, and effectiveness of an intervention to reduce sitting time in stroke survivors.                                                                                                                     | English 2016a [18]   |
| Cardiology (Stroke)                    | Inertial sensor (ActiGraph GT3X+ accelerometer, SenseWear Armband, activPAL3) | Waist (Nonhemip aretic Hip, Right hip)                   | 60 seconds    | Observational (Case control) | Epidemiologic al     | NA | Cardiometabolic and anthropometric measures (ClinRO)<br>Physical activity (PRO)<br>Sleep (PRO)                                                     | Co-Prim Endpoint                       | To investigate the amount and pattern of accumulation of sitting time, physical activity, and use of time in people with stroke compared with age-matched healthy peers.                                                              | English 2016b [19]   |

|                                 |                                                                               |                                |               |                              |                 |                  |                                                                                                                                           |                      |                                                                                                                                                                                                                                                                                                                                       |                             |
|---------------------------------|-------------------------------------------------------------------------------|--------------------------------|---------------|------------------------------|-----------------|------------------|-------------------------------------------------------------------------------------------------------------------------------------------|----------------------|---------------------------------------------------------------------------------------------------------------------------------------------------------------------------------------------------------------------------------------------------------------------------------------------------------------------------------------|-----------------------------|
| Cardiology (Stroke)             | Inertial sensor (ActiGraph GT3X+ accelerometer, SenseWear Armband, activPAL3) | Leg or Foot (Nonparetic Thigh) | Not specified | Observational (Case control) | Quality of life | Mobility (PerfO) | Cardiometabolic and anthropometric measures (ClinRO)<br>Cardiac related endpoints (ClinRO)<br>Mobility related endpoints (ClinRO and PRO) | Exploratory endpoint | To explore the physical, cognitive, and psychological factors associated with daily sitting time and physical activity in people with stroke.                                                                                                                                                                                         | English 2016c [20]          |
| Chronic Fatigue Syndrome        | Inertial sensor (Actical accelerometer)                                       | Wrist (Non-dominant)           | 60 seconds    | Observational (Case control) | Quality of life | NA               | Cardiometabolic and anthropometric measures (ClinRO)<br>Fatigue (PRO)<br>Pain (PRO)<br>Psychosocial (PRO)                                 | Exploratory endpoint | To compare the activity pattern of patients with chronic fatigue syndrome (CFS) with healthy sedentary subjects and examine the relationship between the different parameters of performed activity (registered by an accelerometer device) and symptom severity and fluctuation (registered by questionnaires) in patients with CFS. | Meeus 2011 [21]             |
| Pulmonology (COPD)              | Inertial sensor (ActiGraph GT3X+ accelerometer)                               | Wrist (Non-dominant)           | Not specified | Observational (Cohort study) | Quality of life | NA               | Breathing (PRO)                                                                                                                           | Primary endpoint     | To determine if PA, as measured by a wrist-worn accelerometer, is lower during exacerbations in outpatients with COPD than in periods of clinical stability and to define the temporal course of activity limitation after the onset of the exacerbation, if PA decreases.                                                            | Ehsan 2013 [22]             |
| Pulmonology (COPD)              | Inertial sensor (Actigraph Model GT1M)                                        | Waist                          | 60 seconds    | Observational (Case control) | Epidemiological | NA               | Cardiometabolic and anthropometric measures ClinRO)<br>Breathing (ClinRO)<br>Physical activity (PerfO)                                    | Co-Prim Endpoint     | To assess exercise capacity and physical activity in different stages of COPD and to examine the associations between exercise capacity, pulmonary function and degree of physical activity.                                                                                                                                          | Eliason 2011 [23]           |
| Pulmonology (COPD)              | Inertial sensor (Basic Motionlogger)                                          | Wrist (Dominant)               | Not specified | Observational (Case control) | Quality of life | NA               | Cardiometabolic and anthropometric measures (ClinRO)<br>Breathing (PerfO)<br>Mobility (ClinRO, PerfO, PRO)<br>Physical activity (PRO)     | Primary endpoint     | To determine whether individuals with COPD have decreased arm activity during daily life compared with healthy controls and explore the relationships between arm activity during daily life and arm functional measures in individuals with COPD.                                                                                    | Janaudis-Ferreira 2016 [24] |
| Diabetes (Gestational Diabetes) | Inertial sensor (ActiGraph GT3X+ accelerometer)                               | Waist (Over the Hip)           | Not specified | Observational (Cohort study) | Epidemiological | NA               | Cardiometabolic and anthropometric measures (ClinRO, Biomarkers)<br>Cardiac (ClinRO, Biomarkers)                                          | Co-Prim Endpoint     | To examine the cardiometabolic and inflammatory risk factors associated with accelerometer-based measures of physical activity in women with prior gestational diabetes.                                                                                                                                                              | Gingras 2013 [25]           |

|                           |                                                                           |                          |               |                              |                  |    |                                                                                                                                                      |                      |                                                                                                                                                                                                                                                                                                                   |                        |
|---------------------------|---------------------------------------------------------------------------|--------------------------|---------------|------------------------------|------------------|----|------------------------------------------------------------------------------------------------------------------------------------------------------|----------------------|-------------------------------------------------------------------------------------------------------------------------------------------------------------------------------------------------------------------------------------------------------------------------------------------------------------------|------------------------|
| Diabetes (Type 1, Type 2) | Inertial sensor (Actigraph 7164)                                          | Waist                    | Not specified | Observational (Cohort study) | Epidemiologic al | NA | Cardiometabolic and anthropometric measures (ClinRO)<br>Cardiac (ClinRO, Biomarkers)<br>Glucose (Biomarkers)                                         | Exploratory endpoint | To investigate associations of accelerometry-derived sedentary time with continuous metabolic variables and metabolic outcomes both cross-sectionally and after 5 years of follow-up in a population-based sample of middle-aged patients recently diagnosed with type 2 diabetes compared with matched controls. | Barone Gibbs 2015 [26] |
| Diabetes (Type 1, Type 2) | Inertial sensor (StepWatch activity monitor)                              | Leg or Foot (Ankle)      | Not specified | Observational (Cohort study) | Quality of life  | NA | Mobility (PerFO)<br>Physical activity (PerFO)<br>Psychosocial (PRO)                                                                                  | Co-Prim Endpoint     | To determine whether adults with diabetes and with transtibial amputations (TTAs) are meeting the recommended guidelines for physical activity intensity and daily step counts.                                                                                                                                   | Desveaux 2015 [27]     |
| Diabetes (Type 2)         | Inertial sensor (Actiheart combined accelerometer and heart rate monitor) | Chest                    | 60 seconds    | Observational (Case control) | Epidemiologic al | NA | Cardiometabolic and anthropometric measures (ClinRO, Biomarkers)<br>Cardiac (ClinRO, Biomarkers)<br>Glucose (Biomarkers)                             | Co-Prim Endpoint     | To evaluate physical activity in people with newly diagnosed Type 2 diabetes using objective measures.                                                                                                                                                                                                            | Cichosz 2013 [28]      |
| Diabetes (Type 2)         | Inertial sensor (Actiheart combined accelerometer and heart rate monitor) | Not specified            | Not specified | Observational (Case control) | Epidemiologic al | NA | Cardiac (ClinRO, Biomarkers)                                                                                                                         | Exploratory endpoint | To evaluate the association between objective measures of physical activity and arterial stiffness in a sample of patients recently diagnosed with type 2 diabetes compared with matched controls.                                                                                                                | Funck 2015 [29]        |
| Diabetes (Type 2) Obesity | Inertial sensor (RT3 triaxial accelerometer)                              | Base of the Spine, Waist | Not specified | Observational (Cohort study) | Epidemiologic al | NA | Physical activity (PRO, ClinRO, PerFO, Biomarkers)                                                                                                   | Primary endpoint     | To describe the patterns and correlates of PA in individuals with type 2 diabetes mellitus enrolled in the multi-center Look AHEAD Study using an objective measure of PA (accelerometry).                                                                                                                        | Jakicic 2010 [30]      |
| Geriatrics                | Inertial sensor (Step activity monitor)                                   | Leg or Foot (Ankle)      | Not specified | Observational (Cohort study) | Quality of life  | NA | Mobility (PRO, ObsRO)                                                                                                                                | Primary endpoint     | To describe the amount and patterns of ambulatory activity in hospitalized older adults over consecutive hospital days.                                                                                                                                                                                           | Fisher 2011 [31]       |
| Geriatrics                | Inertial sensor (ActiGraph GT3X+ accelerometer)                           | Waist (Right hip)        | 60 seconds    | Observational (Cohort study) | Epidemiologic al | NA | Adherence (PRO)<br>General health history (PRO)<br>Mobility related endpoints (PRO)<br>Physical activity (ClinRO, PRO)<br>Psychosocial (ClinRO, PRO) | Primary endpoint     | To examine prevalence of adherence to UK guidelines for MVPA among community-dwelling older men and women, alongside a wide range of correlates using accelerometer data.                                                                                                                                         | Jefferis 2014 [32]     |

|            |                                                 |                      |               |                              |                  |    |                                                                                                                                                                                                                               |                      |                                                                                                                                                                                                                                                                                                                                                                                                                                                                                 |                     |
|------------|-------------------------------------------------|----------------------|---------------|------------------------------|------------------|----|-------------------------------------------------------------------------------------------------------------------------------------------------------------------------------------------------------------------------------|----------------------|---------------------------------------------------------------------------------------------------------------------------------------------------------------------------------------------------------------------------------------------------------------------------------------------------------------------------------------------------------------------------------------------------------------------------------------------------------------------------------|---------------------|
| Geriatrics | Inertial sensor (ActiGraph GT3X+ accelerometer) | Waist (Over the Hip) | 60 seconds    | Observational (Cohort study) | Epidemiologic al | NA | Cardiometabolic and anthropometric measures (ClinRO)<br>General health history (PRO)<br>Psychosocial (ClinRO, PRO)                                                                                                            | Co-Prim Endpoint     | To investigate patterns of sedentary behaviour in relation a to key lifestyle factors attributable to older men, as well as physical and mental health status, which are known to be predictors of low PA levels in this population.                                                                                                                                                                                                                                            | Jefferis 2015a [33] |
| Geriatrics | Inertial sensor (ActiGraph GT3X+ accelerometer) | Waist (Right hip)    | 60 seconds    | Observational (Cohort study) | Epidemiologic al | NA | Adherence (PRO)                                                                                                                                                                                                               | Co-Prim Endpoint     | To examine, using objectively measured PA data, average year-on-year changes in the total time and proportion of the day spent in PA of different intensities and changes in the duration of bouts of both MVPA, and SB and we to investigate these year-on-year changes in subgroups of men who did or did not meet the current PA guidelines at each of the time points, in order to examine whether the average annual changes differ in “high active” and “low active” men. | Jefferis 2015c [34] |
| Geriatrics | Inertial sensor (ActiGraph GT3X+ accelerometer) | Waist                | Not specified | Observational (Cohort study) | Quality of life  | NA | Cardiometabolic and anthropometric measures (ClinRO)<br>General health history (PRO)<br>Psychosocial (PRO)                                                                                                                    | Exploratory endpoint | To examine the longitudinal independent associations of objectively assessed physical activity at different intensities, including MVPA, light physical activity, and sedentary behaviors, with dimensions of subjective well-being in older adults.                                                                                                                                                                                                                            | Ku 2016 [35]        |
| Geriatrics | Inertial sensor (activPAL)                      | Leg or Foot (Thigh)  | Not specified | Observational (Cohort study) | Epidemiologic al | NA | Cardiometabolic and anthropometric measures (ClinRO, Biomarkers)<br>Glucose (Biomarkers)<br>General health history (ObsRO, PRO)<br>Mobility (PerFO)<br>Physical activity (PerFO)<br>Psychosocial (ClinRO)<br>Mobility (PerFO) | Exploratory endpoint | To analyze the effect of objectively measured walking and sedentary duration on four-year mortality in community dwelling older people and to investigate the potential role of Biomarkers and other functional measures representing different pathophysiologic pathways in this context.                                                                                                                                                                                      | Klenk 2016 [36]     |
| Geriatrics | Inertial sensor (Walking Style Pro HJ-720IT-E2) | Waist                | Not specified | Observational (Cohort study) | Epidemiologic al | NA |                                                                                                                                                                                                                               | Primary endpoint     | To analyze diurnal profiles of PA for community-dwelling adults aged 70 years and over, and to explore the moderating effect of sex, age, morbidity, mobility limitation, and season on PA throughout the day.                                                                                                                                                                                                                                                                  | Mai 2014 [37]       |

|                                          |                                                                                                             |                                                              |                       |                              |                  |                      |                                                                                                                                |                      |                                                                                                                                                                                                                                                                                                                                  |                           |
|------------------------------------------|-------------------------------------------------------------------------------------------------------------|--------------------------------------------------------------|-----------------------|------------------------------|------------------|----------------------|--------------------------------------------------------------------------------------------------------------------------------|----------------------|----------------------------------------------------------------------------------------------------------------------------------------------------------------------------------------------------------------------------------------------------------------------------------------------------------------------------------|---------------------------|
| Geriatrics (Fall Risk)                   | Inertial sensor (ActiGraph GT3X+ accelerometer)                                                             | Waist (Right hip)                                            | 60 seconds            | Observational (Cohort study) | Epidemiologic al | NA                   | Mobility (ClinRO, PRO)<br>General health history (PRO)<br>Physical activity (ClinRO, PerFO, PRO)<br>Psychosocial (ClinRO, PRO) | Exploratory endpoint | To investigate i) the shape of associations between total amount and intensity of PA and occurrence of falls; ii) whether associations between PA levels and risk of falls differ by age and mobility status; and iii) the role of selected mediators using accelerometer data from a sample of community dwelling older adults. | Jefferis 2015b [38]       |
| Geriatrics (Fall Risk)                   | Inertial sensor (activPAL)                                                                                  | Leg or Foot (Thigh)                                          | Not specified         | Observational (Cohort study) | Epidemiologic al | Mobility (PerFO)     | Mobility (PRO, ClinRO, PerFO)<br>General health history (PRO)                                                                  | Exploratory endpoint | To investigate the relationship between PA and two measures of fall incidence in an elderly population using person-years as well as hours walked as denominators and to compare these two approaches.                                                                                                                           | Klenk 2015 [39]           |
| Nephrology (Dialysis)                    | Inertial sensor (SenseWear Armband)                                                                         | Arm (Non-Dominant Upper)                                     | Not specified         | Observational (Case control) | Epidemiologic al | NA                   | Cardiometabolic and anthropometric measures (ClinRO, Biomarkers)<br>Diet (PRO, ClinRO)                                         | Co-Prim Endpoint     | To assess interdialytic spontaneous physical activity in stable chronic hemodialysis (HD) patients and the relation to nutritional status and dietary intake                                                                                                                                                                     | Cupisti 2011 [40]         |
| Nephrology (Dialysis, Kidney transplant) | Heart rate monitor (Suunto T3c)<br>Location monitor (Suunto T3c)<br><br>Inertial sensor (SenseWear Armband) | Chest (HR and location monitor)<br><br>Arm (Inertial sensor) | 5 second (HR monitor) | Observational (Case control) | Epidemiologic al | Cardiac (Biomarkers) | Cardiometabolic and anthropometric (Biomarkers)<br>Cardiac (Biomarkers)                                                        | Co-Prim Endpoint     | To compare the metabolic and hydration status adaptations to 5 repeated trekking sessions in a 7-day expedition into the Algerian desert between kidney transplanted patients and health control subjects.                                                                                                                       | Mosconi 2011 [41]         |
| Neurology (Multiple Sclerosis)           | Inertial sensor (StepWatch activity monitor)                                                                | Wrist                                                        | Not specified         | Observational (Cohort study) | Quality of life  | NA                   | Mobility (PerFO)<br>Physical activity (PerFO)                                                                                  | Co-Prim Endpoint     | To examine the effects of IVMP on the recovery of walking ability in patients experiencing MS relapse; to compare, head-to-head, the responsiveness of some walking-based measures applied for MS trails; and to consider their potential implications for clinical trials.                                                      | Filipovic Grcic 2011 [42] |
| Neurology (Parkinson's Disease)          | Inertial sensor (DynaPort Hybrid system)                                                                    | Base of the Spine                                            | 60 seconds            | Observational (Cohort study) | Screening        | Mobility (PerFO)     | Mobility (ClinRO, PRO, PerFO)<br>Psychosocial (ClinRO, PRO)                                                                    | Primary endpoint     | To assess the gait pattern of patients who suffer from freezing (i.e., freezers) during routine, daily living community and at-home ambulation and to determine the association between the gait measures and FOG severity and its impact on daily function.                                                                     | Weiss 2014 [43]           |

|                                    |                                                                                  |                                                                           |               |                              |                       |                  |                                                                                                                                                                                        |                      |                                                                                                                                                                                                                                                                                |                          |
|------------------------------------|----------------------------------------------------------------------------------|---------------------------------------------------------------------------|---------------|------------------------------|-----------------------|------------------|----------------------------------------------------------------------------------------------------------------------------------------------------------------------------------------|----------------------|--------------------------------------------------------------------------------------------------------------------------------------------------------------------------------------------------------------------------------------------------------------------------------|--------------------------|
| Neurology<br>(Parkinson's Disease) | Inertial sensor (wearable CuPiD system),<br><br>Pressure sensor (PKMAS walkways) | Leg or Foot (Ankle, Foot),<br><br>Not Attached to the Body (On the floor) | 100 Hz        | Interventional (RCT)         | Quality of life       | Mobility (PerFO) | Adherence (PRO)<br>Mobility (PerFO)<br>Physical (PerFO)<br>Psychosocial (ClinRO)                                                                                                       | Primary endpoint     | To test the feasibility of training with the CuPiD system in the home environment, and to discover the differential effects of CuPiD training including biofeedback from a wearable device versus conventional home-based gait intervention on gait, balance and HR-QoL in PD. | Ginis 2016 [44]          |
| Nutrition                          | Inertial sensor (ActiGraph GT3X+ accelerometer)                                  | Waist (Right hip)                                                         | Not specified | Interventional (RCT)         | Treatment (Phase III) | NA               | Cardiometabolic and anthropometric measures (ClinRO)<br>General demographics and parental history (ObsRO, PRO, ClinRO)<br>General health history (ObsRO)                               | Primary endpoint     | To measure the effects of daily dietary supplementation with lipid-based nutrient supplements on 18-month-old children's PA over 12 months.                                                                                                                                    | Pulakka 2015 [45]        |
| Obesity                            | Inertial sensor (Actigraph 7164, Actigraph Model GT1M)                           | Base of the Spine, Waist                                                  | Not specified | Observational (Cohort study) | Epidemiologic al      | NA               | Cardiometabolic and anthropometric measures (ClinRO)                                                                                                                                   | Exploratory endpoint | To examine the independent associations of time spent in MVPA and sedentary time, with total and abdominal body fat, and the bidirectionality of these associations in adults at high risk of type 2 diabetes.                                                                 | Golubic 2015 [46]        |
| Obesity                            | Inertial sensor (ActiGraph GT3X+ accelerometer)                                  | Waist                                                                     | Not specified | Observational (Case control) | Epidemiologic al      | NA               | Cardiometabolic and anthropometric measures (ClinRO, Biomarkers)<br>Diet (PRO)<br>Cardiac (ClinROClinRO, Biomarkers)<br>Glucose (Biomarkers)<br>Physical activity (PRO)<br>Sleep (PRO) | Co-Prim Endpoint     | To determine whether PA, sedentary behavior and/or diet differ between metabolically healthy and unhealthy overweight and obese young African American and Caucasian women.                                                                                                    | Camhi 2015 [47]          |
| Obesity                            | Inertial sensor (ActiGraph GT3X+ accelerometer, Fitbit One)                      | Various locations (Waistband , bra, pants pocket), Waist                  | Not specified | Observational (Cohort study) | Quality of life       | NA               | Cardiometabolic and anthropometric measures (ClinROClinRO)                                                                                                                             | Primary endpoint     | To assess the trajectory of physical activity adherence across a 16-week self-monitoring intervention, as measured by the Fitbit tracker.                                                                                                                                      | Cadmus-Bertram 2015 [48] |
| Obesity                            | Inertial sensor (GENEActiv)                                                      | Wrist (Non-dominant)                                                      | 87.5 Hz       | Observational (Cohort study) | Prevention            | NA               | Cardiometabolic and anthropometric measures (ClinRO)<br>Diet (PRO)<br>Physical activity (PRO)<br>Sleep (PRO)<br>General health                                                         | Co-Prim Endpoint     | To examine differences in total and MVPA between healthy and unhealthy obese groups by using both self-report and wrist-worn accelerometer assessments.                                                                                                                        | Bell 2015 [49]           |

|                                                                  |                                                   |                                |               |                              |                  |                  |                                                                                                                                 |                      |                                                                                                                                                                                                                                                                                                                                                                               |                     |
|------------------------------------------------------------------|---------------------------------------------------|--------------------------------|---------------|------------------------------|------------------|------------------|---------------------------------------------------------------------------------------------------------------------------------|----------------------|-------------------------------------------------------------------------------------------------------------------------------------------------------------------------------------------------------------------------------------------------------------------------------------------------------------------------------------------------------------------------------|---------------------|
|                                                                  |                                                   |                                |               |                              |                  |                  | history (PRO)                                                                                                                   |                      |                                                                                                                                                                                                                                                                                                                                                                               |                     |
| Obesity                                                          | Inertial sensor (Kenz Lifecorder-Calorie counter) | Waist                          | Not specified | Observational (Cohort study) | Epidemiologic al | NA               | Cardiometabolic and anthropometric measures (ClinRO) Diet (PRO) Physical activity (PerFO, ObsRO)                                | Co-Prim Endpoint     | To determine if Japanese rural children would have a higher prevalence of overweight and obesity, a lower daily PA because of lower active commuting, and a higher energy intake compared with Japanese urban children; and if the lower daily PA and lower active commuting are associated with weight status.                                                               | Itoi 2012 [50]      |
| Obesity (Postmenopausal Obesity)                                 | Inertial sensor (Actigraph Model GT1M)            | Base of the Spine, Waist       | Not specified | Observational (Cohort study) | Epidemiologic al | NA               | Cardiometabolic and anthropometric measures (ClinRO, Biomarkers) General health history (PRO, ClinRO) Psychosocial (ClinRO,PRO) | Exploratory endpoint | To establish a relationship between the level of PA, based on an objective measure of number of steps per day using accelerometer, and obesity, measured with the body composition of postmenopausal women.                                                                                                                                                                   | Kroemeke 2014 [51]  |
| Obesity Physical Activity (PA during pregnancy)                  | Inertial sensor (Actigraph accelerometer)         | Not specified                  | Not specified | Observational (Cohort study) | Epidemiologic al | NA               | Cardiometabolic and anthropometric measures (ClinRO)                                                                            | Co-Prim Endpoint     | To explore patterns of PA and factors associated with change in PA in obese pregnant women.                                                                                                                                                                                                                                                                                   | Hayes 2015 [52]     |
| Obesity Psychological (Schizophrenia/Schiz o affective Disorder) | Inertial sensor (Actigraph 7164)                  | Waist (Right hip)              | 60 seconds    | Observational (Cohort study) | Epidemiologic al | NA               | Physical activity (ClinRO, PerFO) Psychosocial (ClinRO, PRO)                                                                    | Exploratory endpoint | To investigate the association between objectively measured sedentary behavior and psychiatric symptoms in overweight and obese adults with SZO/SA.                                                                                                                                                                                                                           | Janney 2013 [53]    |
| Orthopedics (Ankle Sprains)                                      | Inertial sensor (activPAL)                        | Leg or Foot (Thigh)            | Not specified | Observational (Case control) | Quality of life  | NA               | Mobility (ClinRO) Pain (PRO)                                                                                                    | Co-Prim Endpoint     | To use accelerometers to describe PA in the first week after ankle sprain and to compare results with a healthy control group.                                                                                                                                                                                                                                                | Tully 2012 [54]     |
| Orthopedics (Hip Fracture)                                       | Inertial sensor (activPAL)                        | Leg or Foot (Nonparetic Thigh) | Not specified | Interventional (RCT)         | Quality of life  | Mobility (PerFO) | Mobility (ClinRO, PerFO) Pain (ClinRO, PRO)                                                                                     | Primary endpoint     | To assess if daily physical behavior as indicated by time spent in upright positions (standing and walking) the fourth day after surgery differed between hip fracture patients treated in a geriatric ward receiving comprehensive geriatric assessment compared with hip fracture patients receiving conventional treatment in an orthopedic ward. To assess differences in | Taraldsen 2014 [55] |

|                                                 |                                                 |                      |               |                              |                          |               |                                                                                                    |                                     |                                                                                                                                                                                                                                                                                                 |                          |
|-------------------------------------------------|-------------------------------------------------|----------------------|---------------|------------------------------|--------------------------|---------------|----------------------------------------------------------------------------------------------------|-------------------------------------|-------------------------------------------------------------------------------------------------------------------------------------------------------------------------------------------------------------------------------------------------------------------------------------------------|--------------------------|
|                                                 |                                                 |                      |               |                              |                          |               |                                                                                                    |                                     | number of upright events during the day and physical function in terms of need for help during ambulation and lower limb functions.                                                                                                                                                             |                          |
| Orthopedics (Lower Limb Fractures)              | Inertial sensor (Actigraph 7164)                | Waist (Right hip)    | Not specified | Observational (Case control) | Quality of life          | NA            | Cardiometabolic and anthropometric measures (ClinRO)                                               | Co-Prim Endpoint                    | To elucidate whether PA levels normalize after bone healing of lower limb fractures in a sample of adolescents, using accelerometry assessments.                                                                                                                                                | Ceroni 2012 [56]         |
| Pediatrics (Adolescent Physical Activity)       | Inertial sensor (ActiGraph GT3X+ accelerometer) | Waist (Right hip)    | Not specified | Interventional (RCT)         | Prevention               | NA            | Cardiometabolic and anthropometric measures (ClinRO) Psychosocial (ObsRO, PRO)                     | Exploratory endpoint                | To compare the WebDASC-reported EI against TEE as derived from accelerometers on schoolchildren aged 8~11 during two periods of 7 consecutive days: at baseline when the children ate their usual packed lunches and at intervention when children were served NND for school lunch and snacks. | Biltoft-Jensen 2013 [57] |
| Pediatrics (Adolescent Physical Activity)       | Inertial sensor (ActiGraph GT3X+ accelerometer) | Waist (Over the Hip) | 30 Hz         | Observational (Cohort study) | Epidemiologic al studies | NA            | Meteorological information (ObsRO)                                                                 | Co-Prim Endpoint                    | To examine how children's objectively-measured PA differed across seasons, and whether different seasonal patterns were observed for boys and girls.                                                                                                                                            | Ridgers 2015 [58]        |
| Pediatrics (Adolescent Physical Activity) Sleep | Inertial sensor (ActiGraph GT3X+ accelerometer) | Waist (Right hip)    | 60 seconds    | Observational (Cohort study) | Epidemiologic al         | Sleep (PerfO) | Cardiometabolic and anthropometric measures (ClinRO) Physical activity (ClinRO) Sleep (PRO, ObsRO) | Co-Prim Endpoint                    | To examine between-season and within-week variation in physical activity, sedentary behaviour, cardio-respiratory fitness and sleep duration among 8–11 year-old children.                                                                                                                      | Hjorth 2013 [59]         |
| Pediatrics (Adolescent Physical Activity)       | Inertial sensor (Actigraph Model GT1M)          | Waist (Right hip)    | 15 seconds    | Observational (Cohort study) | Epidemiologic al         | NA            | General demographics and parental history (ObsRO)                                                  | Primary endpoint Secondary endpoint | To examine differences in sedentary time and bouts during and outside of childcare/school periods, and changes in sedentary time and bouts over 1-year among children who remained in childcare (childcare subsample) and among those who transitioned to school (school transition subsample)  | Carson 2016 [60]         |

|                                                                         |                                                      |                          |                         |                              |                  |               |                                                                                           |                      |                                                                                                                                                                                                                                        |                      |
|-------------------------------------------------------------------------|------------------------------------------------------|--------------------------|-------------------------|------------------------------|------------------|---------------|-------------------------------------------------------------------------------------------|----------------------|----------------------------------------------------------------------------------------------------------------------------------------------------------------------------------------------------------------------------------------|----------------------|
| Psychology (Major Depressive Disorder)                                  | Inertial sensor (Ruputer)                            | Wrist (Non-dominant)     | Not specified           | Observational (Case control) | Epidemiologic al | NA            | Psychosocial (PRO, ClinRO)<br>Sleep (PRO)                                                 | Exploratory endpoint | To investigate psychobehavioral correlates, particularly the statistical associations between momentary depressive mood and behavioral dynamics measured objectively, in patients with major depressive disorder and healthy subjects. | Kim 2015 [61]        |
| Reproductive and peripartum health (C-Reactive Protein in Pregnancy)    | Inertial sensor (Actigraph 7164)                     | Waist (Right hip)        | Not specified           | Observational (Cohort study) | Prevention       | NA            | Cardiometabolic and anthropometric measures (Biomarkers)<br>Physical activity (PerfO)     | Exploratory endpoint | To evaluate the association between objectively measured physical activity, sedentary behavior, and CRP by pregnancy trimester.                                                                                                        | Hawkins 2014 [62]    |
| Reproductive and peripartum health (Postmenopausal Estrogen Metabolism) | Inertial sensor (Actigraph 7164)                     | Waist                    | Not specified           | Observational (Cohort study) | Epidemiologic al | NA            | Cardiometabolic and anthropometric measures (Biomarkers)<br>General health history (PRO)  | Exploratory endpoint | To assess the role of accelerometer-measured physical activity and sedentary behavior on a comprehensive profile of 15 urinary estrogens and EM among postmenopausal women from a population-based breast cancer case control study.   | Dallal 2015 [63]     |
| Reproductive and peripartum health (PA among postpartum women)          | Inertial sensor (Active Australia Survey instrument) | Not specified            | 4 seconds and 2 minutes | Interventional (RCT)         | Prevention       | NA            | Adherence (ObsRO)<br>Physical activity (PRO)<br>Psychosocial (PRO)                        | Primary endpoint     | To determine if a tailored intervention would significantly increase MVPA more than the standard intervention, as measured by surveys and accelerometers among postpartum ethnic minority women.                                       | Albright 2014 [64]   |
| Sleep (Insomnia)                                                        | Inertial sensor (SenseWear Armband)                  | Arm (Non-Dominant Upper) | Not specified           | Interventional (RCT)         | Quality of life  | Sleep (PerfO) | Psychosocial (PRO, ClinCRO)<br>Sleep (PerfO, PRO, ClinRO)<br>General health history (PRO) | Secondary endpoint   | To determine whether nightly administration of melatonin, magnesium, and zinc improves primary insomnia in long-term care facility residents, aged 70 and older.                                                                       | Rondanelli 2011 [65] |

PerfO = Performance Outcome; ObsRO = Observer Reported Outcome; PRO = Patient Reported Outcome; ClinRO = Clinician Reported Outcome

## References

1. Murphy SL, Lyden AK, Clary M, Geisser ME, Yung RL, Clauw DJ, et al. Activity pacing for osteoarthritis symptom management: study design and methodology of a randomized trial testing a tailored clinical approach using accelerometers for veterans and non-veterans. *BMC musculoskeletal disorders*. 2011;12:177. Epub 2011/08/04. doi: 10.1186/1471-2474-12-177. PubMed PMID: 21810253; PubMed Central PMCID: PMC3162944.
2. Ilich SS, Dempsey AR, Mills PM, Sturnieks DL, Stachowiak GW, Maguire KF, et al. Physical activity patterns and function 3 months after arthroscopic partial meniscectomy. *Journal of science and medicine in sport / Sports Medicine Australia*. 2013;16(3):195-9. Epub 2012/09/12. doi: 10.1016/j.jsams.2012.08.007. PubMed PMID: 22964451.
3. Hashimoto T, Yoshiuchi K, Inada S, Shirakura K, Wada N, Takeuchi K, et al. Physical activity of elderly patients with rheumatoid arthritis and healthy individuals: an actigraphy study. *BioPsychoSocial medicine*. 2015;9:19. Epub 2015/10/07. doi: 10.1186/s13030-015-0046-0. PubMed PMID: 26442128; PubMed Central PMCID: PMC4593190.
4. Phillips SM, McAuley E. Physical activity and fatigue in breast cancer survivors: a panel model examining the role of self-efficacy and depression. *Cancer epidemiology, biomarkers & prevention : a publication of the American Association for Cancer Research, cosponsored by the American Society of Preventive Oncology*. 2013;22(5):773-81. Epub 2013/03/05. doi: 10.1158/1055-9965.epi-12-0983. PubMed PMID: 23456557; PubMed Central PMCID: PMC3650084.
5. Hartman SJ, Natarajan L, Palmer BW, Parker B, Patterson RE, Sears DD. Impact of increasing physical activity on cognitive functioning in breast cancer survivors: Rationale and study design of Memory & Motion. *Contemporary clinical trials*. 2015;45(Pt B):371-6. Epub 2015/10/03. doi: 10.1016/j.cct.2015.09.021. PubMed PMID: 26427563; PubMed Central PMCID: PMC4674350.
6. van der Meij BS, Langius JA, Spreeuwenberg MD, Sloomaker SM, Paul MA, Smit EF, et al. Oral nutritional supplements containing n-3 polyunsaturated fatty acids affect quality of life and functional status in lung cancer patients during multimodality treatment: an RCT. *European journal of clinical nutrition*. 2012;66(3):399-404. Epub 2012/01/12. doi: 10.1038/ejcn.2011.214. PubMed PMID: 22234041; PubMed Central PMCID: PMC3303137.
7. Marschollek M. Physical activity event regularity and health outcome - 'Undiscovered country' in cohort accelerometer data. *Studies in health technology and informatics*. 2015;210:657-9. Epub 2015/05/21. PubMed PMID: 25991230.
8. Klenk J, Denking M, Nikolaus T, Peter R, Rothenbacher D, Koenig W. Association of objectively measured physical activity with established and novel cardiovascular biomarkers in elderly subjects: every step counts. *Journal of epidemiology and community health*. 2013;67(2):194-7. Epub 2012/08/30. doi: 10.1136/jech-2012-201312. PubMed PMID: 22930799.
9. Buijs DM, Ramadi A, MacDonald K, Lightfoot R, Senaratne M, Haennel RG. Quantity and Quality of Daily Physical Activity in Older Cardiac Patients. *Canadian journal of cardiovascular nursing = Journal canadien en soins infirmiers cardio-vasculaires*. 2015;25(3):10-6. Epub 2015/09/22. PubMed PMID: 26387271.
10. Alosco ML, Spitznagel MB, Cohen R, Raz N, Sweet LH, Josephson R, et al. Decreased physical activity predicts cognitive dysfunction and reduced cerebral blood flow in heart failure. *Journal of the neurological sciences*. 2014;339(1-2):169-75. Epub 2014/03/04. doi: 10.1016/j.jns.2014.02.008. PubMed PMID: 24581672; PubMed Central PMCID: PMC4009239.
11. Ewalt LA, Danduran MJ, Strath SJ, Moerchen V, Swartz AM. Objectively assessed physical activity and sedentary behaviour does not differ between children and adolescents with and without a congenital heart defect: a pilot examination. *Cardiology in the young*. 2012;22(1):34-41. Epub 2011/07/07. doi: 10.1017/s1047951111000837. PubMed PMID: 21729504.
12. Hamer M, Venuraju SM, Lahiri A, Rossi A, Steptoe A. Objectively assessed physical activity, sedentary time, and coronary artery calcification in healthy older adults. *Arteriosclerosis, thrombosis, and vascular biology*. 2012;32(2):500-5. Epub 2011/11/15. doi: 10.1161/atvbaha.111.236877. PubMed PMID: 22075247.
13. Prince SA, Blanchard CM, Grace SL, Reid RD. Objectively-measured sedentary time and its association with markers of cardiometabolic health and fitness among cardiac rehabilitation graduates. *European journal of preventive cardiology*. 2016;23(8):818-25. Epub 2015/11/27. doi: 10.1177/2047487315617101. PubMed PMID: 26607698.

14. Panza GA, Taylor BA, Thompson PD, Erhard L, Capizzi JA, Grimaldi AS, et al. The Effect of Atorvastatin on Habitual Physical Activity among Healthy Adults. *Medicine and science in sports and exercise*. 2016;48(1):1-6. Epub 2015/07/22. doi: 10.1249/mss.0000000000000740. PubMed PMID: 26197031; PubMed Central PMCID: PMC4681632.
15. Redfield MM, Anstrom KJ, Levine JA, Koepp GA, Borlaug BA, Chen HH, et al. Isosorbide Mononitrate in Heart Failure with Preserved Ejection Fraction. *The New England journal of medicine*. 2015;373(24):2314-24. Epub 2015/11/10. doi: 10.1056/NEJMoa1510774. PubMed PMID: 26549714; PubMed Central PMCID: PMC4712067.
16. Fokkenrood HJ, Lauret GJ, Verhofstad N, Bendermacher BL, Scheltinga MR, Teijink JA. The effect of supervised exercise therapy on physical activity and ambulatory activities in patients with intermittent claudication. *European journal of vascular and endovascular surgery : the official journal of the European Society for Vascular Surgery*. 2015;49(2):184-91. Epub 2014/12/17. doi: 10.1016/j.ejvs.2014.11.002. PubMed PMID: 25496986.
17. Lauret GJ, Fokkenrood HJ, Bendermacher BL, Scheltinga MR, Teijink JA. Physical activity monitoring in patients with intermittent claudication. *European journal of vascular and endovascular surgery : the official journal of the European Society for Vascular Surgery*. 2014;47(6):656-63. Epub 2014/04/17. doi: 10.1016/j.ejvs.2014.03.001. PubMed PMID: 24735778.
18. English C, Healy GN, Olds T, Parfitt G, Borkoles E, Coates A, et al. Reducing Sitting Time After Stroke: A Phase II Safety and Feasibility Randomized Controlled Trial. *Archives of physical medicine and rehabilitation*. 2016;97(2):273-80. Epub 2015/11/04. doi: 10.1016/j.apmr.2015.10.094. PubMed PMID: 26529471.
19. English C, Healy GN, Coates A, Lewis L, Olds T, Bernhardt J. Sitting and Activity Time in People With Stroke. *Physical therapy*. 2016;96(2):193-201. Epub 2015/06/27. doi: 10.2522/ptj.20140522. PubMed PMID: 26112254.
20. English C, Healy GN, Coates A, Lewis LK, Olds T, Bernhardt J. Sitting time and physical activity after stroke: physical ability is only part of the story. *Topics in stroke rehabilitation*. 2016;23(1):36-42. Epub 2015/08/11. doi: 10.1179/1945511915y.0000000009. PubMed PMID: 26257146.
21. Meeus M, van Eupen I, van Baarle E, De Boeck V, Luyckx A, Kos D, et al. Symptom fluctuations and daily physical activity in patients with chronic fatigue syndrome: a case-control study. *Archives of physical medicine and rehabilitation*. 2011;92(11):1820-6. Epub 2011/10/29. doi: 10.1016/j.apmr.2011.06.023. PubMed PMID: 22032215.
22. Ehsan M, Khan R, Wakefield D, Qureshi A, Murray L, Zuwallack R, et al. A longitudinal study evaluating the effect of exacerbations on physical activity in patients with chronic obstructive pulmonary disease. *Annals of the American Thoracic Society*. 2013;10(6):559-64. Epub 2013/09/24. doi: 10.1513/AnnalsATS.201304-100OC. PubMed PMID: 24053416.
23. Eliason G, Zakrisson AB, Piehl-Aulin K, Hurtig-Wennlof A. Physical activity patterns in patients in different stages of chronic obstructive pulmonary disease. *Copd*. 2011;8(5):369-74. Epub 2011/09/08. doi: 10.3109/15412555.2011.605403. PubMed PMID: 21895516.
24. Janaudis-Ferreira T, Mathur S, Romano JM, Goldstein RS, Brooks D. Arm Activity During Daily Life in Individuals With Chronic Obstructive Pulmonary Disease. *Journal of cardiopulmonary rehabilitation and prevention*. 2016;36(2):125-31. Epub 2015/10/16. doi: 10.1097/hcr.000000000000153. PubMed PMID: 26468630.
25. Gingras V, Vigneault J, Weisnagel SJ, Tchernof A, Robitaille J. Accelerometry-measured physical activity and inflammation after gestational diabetes. *Medicine and science in sports and exercise*. 2013;45(7):1307-12. Epub 2013/03/09. doi: 10.1249/MSS.0b013e318285402b. PubMed PMID: 23470316.
26. Barone Gibbs B, Pettee Gabriel K, Reis JP, Jakicic JM, Carnethon MR, Sternfeld B. Cross-sectional and longitudinal associations between objectively measured sedentary time and metabolic disease: the Coronary Artery Risk Development in Young Adults (CARDIA) study. *Diabetes care*. 2015;38(10):1835-43. Epub 2015/07/15. doi: 10.2337/dc15-0226. PubMed PMID: 26156528; PubMed Central PMCID: PMC4580607.
27. Desveaux L, Goldstein RS, Mathur S, Hassan A, Devlin M, Pauley T, et al. Physical Activity in Adults with Diabetes Following Prosthetic Rehabilitation. *Canadian journal of diabetes*. 2016. Epub 2016/04/08. doi: 10.1016/j.jcjd.2016.02.003. PubMed PMID: 27052673.
28. Cichosz SL, Fleischer J, Hoeyem P, Laugesen E, Poulsen PL, Christiansen JS, et al. Objective measurements of activity patterns in people with newly diagnosed Type 2 diabetes demonstrate a sedentary lifestyle. *Diabetic medicine : a journal of the British Diabetic Association*. 2013;30(9):1063-6. Epub 2013/04/23. doi: 10.1111/dme.12199. PubMed PMID: 23600518.

29. Funck KL, Laugesen E, Hoyem P, Fleischer J, Cichosz SL, Christiansen JS, et al. Low Physical Activity Is Associated With Increased Arterial Stiffness in Patients Recently Diagnosed With Type 2 Diabetes. *American journal of hypertension*. 2015. Epub 2015/12/31. doi: 10.1093/ajh/hpv197. PubMed PMID: 26714500.
30. Jakicic JM, Gregg E, Knowler W, Kelley DE, Lang W, Miller GD, et al. Activity patterns of obese adults with type 2 diabetes in the look AHEAD study. *Medicine and science in sports and exercise*. 2010;42(11):1995-2005. Epub 2010/04/14. doi: 10.1249/MSS.0b013e3181e054f0. PubMed PMID: 20386337; PubMed Central PMCID: PMCPMC2945405.
31. Fisher SR, Goodwin JS, Protas EJ, Kuo YF, Graham JE, Ottenbacher KJ, et al. Ambulatory activity of older adults hospitalized with acute medical illness. *Journal of the American Geriatrics Society*. 2011;59(1):91-5. Epub 2010/12/17. doi: 10.1111/j.1532-5415.2010.03202.x. PubMed PMID: 21158744; PubMed Central PMCID: PMCPMC3133455.
32. Jefferis BJ, Sartini C, Lee IM, Choi M, Amuzu A, Gutierrez C, et al. Adherence to physical activity guidelines in older adults, using objectively measured physical activity in a population-based study. *BMC public health*. 2014;14:382. Epub 2014/04/22. doi: 10.1186/1471-2458-14-382. PubMed PMID: 24745369; PubMed Central PMCID: PMCPMC4021412.
33. Jefferis BJ, Sartini C, Shiroma E, Whincup PH, Wannamethee SG, Lee IM. Duration and breaks in sedentary behaviour: accelerometer data from 1566 community-dwelling older men (British Regional Heart Study). *British journal of sports medicine*. 2015;49(24):1591-4. Epub 2014/09/19. doi: 10.1136/bjsports-2014-093514. PubMed PMID: 25232029; PubMed Central PMCID: PMCPMC4363289.
34. Jefferis BJ, Sartini C, Ash S, Lennon LT, Wannamethee SG, Lee IM, et al. Trajectories of objectively measured physical activity in free-living older men. *Medicine and science in sports and exercise*. 2015;47(2):343-9. Epub 2014/07/06. doi: 10.1249/mss.0000000000000410. PubMed PMID: 24988411; PubMed Central PMCID: PMCPMC4281510.
35. Ku PW, Fox KR, Liao Y, Sun WJ, Chen LJ. Prospective associations of objectively assessed physical activity at different intensities with subjective well-being in older adults. *Quality of life research : an international journal of quality of life aspects of treatment, care and rehabilitation*. 2016. Epub 2016/05/08. doi: 10.1007/s11136-016-1309-3. PubMed PMID: 27153854.
36. Klenk J, Dallmeier D, Denking MD, Rapp K, Koenig W, Rothenbacher D. Objectively Measured Walking Duration and Sedentary Behaviour and Four-Year Mortality in Older People. *PloS one*. 2016;11(4):e0153779. Epub 2016/04/16. doi: 10.1371/journal.pone.0153779. PubMed PMID: 27082963; PubMed Central PMCID: PMCPMC4833405.
37. Mai A, Bloch A, Klaassen-Mielke R, Platen P, Hinrichs T. Diurnal profiles of pedometer-determined physical activity in chronically ill and mobility-limited older adults: a cross-sectional study. *BMC public health*. 2014;14:1268. Epub 2014/12/17. doi: 10.1186/1471-2458-14-1268. PubMed PMID: 25495494; PubMed Central PMCID: PMCPMC4320556.
38. Jefferis BJ, Merom D, Sartini C, Wannamethee SG, Ash S, Lennon LT, et al. Physical Activity and Falls in Older Men: The Critical Role of Mobility Limitations. *Medicine and science in sports and exercise*. 2015;47(10):2119-28. Epub 2015/02/11. doi: 10.1249/mss.0000000000000635. PubMed PMID: 25668406.
39. Klenk J, Kerse N, Rapp K, Nikolaus T, Becker C, Rothenbacher D, et al. Physical Activity and Different Concepts of Fall Risk Estimation in Older People--Results of the ActiFE-Ulm Study. *PloS one*. 2015;10(6):e0129098. Epub 2015/06/10. doi: 10.1371/journal.pone.0129098. PubMed PMID: 26058056; PubMed Central PMCID: PMCPMC4461251.
40. Cupisti A, Capitanini A, Betti G, D'Alessandro C, Barsotti G. Assessment of habitual physical activity and energy expenditure in dialysis patients and relationships to nutritional parameters. *Clinical nephrology*. 2011;75(3):218-25. Epub 2011/02/19. PubMed PMID: 21329632.
41. Mosconi G, Colombo D, Graziani E, Franceschelli N, Roi GS, Totti V, et al. Physical performance in kidney transplanted patients: a study on desert trekking. *Journal of biological regulators and homeostatic agents*. 2011;25(3):417-25. Epub 2011/10/26. PubMed PMID: 22023766.
42. Filipovic Grcic P, Matijaca M, Lusic I, Capkun V. Responsiveness of walking-based outcome measures after multiple sclerosis relapses following steroid pulses. *Medical science monitor : international medical journal of experimental and clinical research*. 2011;17(12):Cr704-10. Epub 2011/12/02. PubMed PMID: 22129902; PubMed Central PMCID: PMCPMC3628135.

43. Weiss A, Herman T, Giladi N, Hausdorff JM. Objective assessment of fall risk in Parkinson's disease using a body-fixed sensor worn for 3 days. *PloS one*. 2014;9(5):e96675. Epub 2014/05/08. doi: 10.1371/journal.pone.0096675. PubMed PMID: 24801889; PubMed Central PMCID: PMC4011791.
44. Ginis P, Nieuwboer A, Dorfman M, Ferrari A, Gazit E, Canning CG, et al. Feasibility and effects of home-based smartphone-delivered automated feedback training for gait in people with Parkinson's disease: A pilot randomized controlled trial. *Parkinsonism & related disorders*. 2016;22:28-34. Epub 2016/01/19. doi: 10.1016/j.parkreldis.2015.11.004. PubMed PMID: 26777408.
45. Pulakka A, Ashorn U, Cheung YB, Dewey KG, Maleta K, Vosti SA, et al. Effect of 12-month intervention with lipid-based nutrient supplements on physical activity of 18-month-old Malawian children: a randomised, controlled trial. *European journal of clinical nutrition*. 2015;69(2):173-8. Epub 2014/07/17. doi: 10.1038/ejcn.2014.138. PubMed PMID: 25028082.
46. Golubic R, Wijndaele K, Sharp SJ, Simmons RK, Griffin SJ, Wareham NJ, et al. Physical activity, sedentary time and gain in overall and central body fat: 7-year follow-up of the ProActive trial cohort. *International journal of obesity (2005)*. 2015;39(1):142-8. Epub 2014/04/16. doi: 10.1038/ijo.2014.66. PubMed PMID: 24732143; PubMed Central PMCID: PMC4113455.
47. Camhi SM, Crouter SE, Hayman LL, Must A, Lichtenstein AH. Lifestyle Behaviors in Metabolically Healthy and Unhealthy Overweight and Obese Women: A Preliminary Study. *PloS one*. 2015;10(9):e0138548. Epub 2015/09/19. doi: 10.1371/journal.pone.0138548. PubMed PMID: 26383251; PubMed Central PMCID: PMC4575188.
48. Cadmus-Bertram L, Marcus BH, Patterson RE, Parker BA, Morey BL. Use of the Fitbit to Measure Adherence to a Physical Activity Intervention Among Overweight or Obese, Postmenopausal Women: Self-Monitoring Trajectory During 16 Weeks. *JMIR mHealth and uHealth*. 2015;3(4):e96. Epub 2015/11/21. doi: 10.2196/mhealth.4229. PubMed PMID: 26586418; PubMed Central PMCID: PMC4705008.
49. Bell JA, Hamer M, van Hees VT, Singh-Manoux A, Kivimaki M, Sabia S. Healthy obesity and objective physical activity. *The American journal of clinical nutrition*. 2015;102(2):268-75. Epub 2015/07/15. doi: 10.3945/ajcn.115.110924. PubMed PMID: 26156738; PubMed Central PMCID: PMC4515867.
50. Itoi A, Yamada Y, Watanabe Y, Kimura M. Physical activity, energy intake, and obesity prevalence among urban and rural schoolchildren aged 11-12 years in Japan. *Applied physiology, nutrition, and metabolism = Physiologie appliquee, nutrition et metabolisme*. 2012;37(6):1189-99. Epub 2012/11/28. doi: 10.1139/h2012-100. PubMed PMID: 23176526.
51. Kroemeke A, Zajac-Gawlak I, Pospiech D, Gaba A, Pridalova M, Pelclova J. Postmenopausal obesity: 12,500 steps per day as a remedy? Relationships between body composition and daily steps in postmenopausal women. *Przegląd menopauzalny = Menopause review*. 2014;13(4):227-32. Epub 2015/09/04. doi: 10.5114/pm.2014.44998. PubMed PMID: 26327859; PubMed Central PMCID: PMC4520368.
52. Hayes L, McParlin C, Kinnunen TI, Poston L, Robson SC, Bell R. Change in level of physical activity during pregnancy in obese women: findings from the UPBEAT pilot trial. *BMC pregnancy and childbirth*. 2015;15:52. Epub 2015/04/18. doi: 10.1186/s12884-015-0479-2. PubMed PMID: 25886590; PubMed Central PMCID: PMC4352291.
53. Janney CA, Ganguli R, Richardson CR, Holleman RG, Tang G, Cauley JA, et al. Sedentary behavior and psychiatric symptoms in overweight and obese adults with schizophrenia and schizoaffective disorders (WAIST Study). *Schizophrenia research*. 2013;145(1-3):63-8. Epub 2013/02/16. doi: 10.1016/j.schres.2013.01.010. PubMed PMID: 23410710; PubMed Central PMCID: PMC3836608.
54. Tully MA, Bleakley CM, O'Connor SR, McDonough SM. Functional management of ankle sprains: what volume and intensity of walking is undertaken in the first week postinjury. *British journal of sports medicine*. 2012;46(12):877-82. Epub 2012/01/24. doi: 10.1136/bjsports-2011-090692. PubMed PMID: 22267573.
55. Taraldsen K, Sletvold O, Thingstad P, Saltvedt I, Granat MH, Lydersen S, et al. Physical behavior and function early after hip fracture surgery in patients receiving comprehensive geriatric care or orthopedic care--a randomized controlled trial. *The journals of gerontology Series A, Biological sciences and medical sciences*. 2014;69(3):338-45. Epub 2013/08/02. doi: 10.1093/gerona/glt097. PubMed PMID: 23902933.
56. Ceroni D, Martin X, Lamah L, Delhumeau C, Farpour-Lambert N, De Coulon G, et al. Recovery of physical activity levels in adolescents after lower limb fractures: a longitudinal, accelerometry-based activity monitor study. *BMC musculoskeletal disorders*. 2012;13:131. Epub 2012/07/27. doi: 10.1186/1471-2474-13-131. PubMed PMID: 22831387; PubMed Central PMCID: PMC3414777.

57. Biloft-Jensen A, Hjorth MF, Trolle E, Christensen T, Brockhoff PB, Andersen LF, et al. Comparison of estimated energy intake using Web-based Dietary Assessment Software with accelerometer-determined energy expenditure in children. *Food & nutrition research*. 2013;57. Epub 2013/12/21. doi: 10.3402/fnr.v57i0.21434. PubMed PMID: 24358037; PubMed Central PMCID: PMC3867750.
58. Ridgers ND, Salmon J, Timperio A. Too hot to move? Objectively assessed seasonal changes in Australian children's physical activity. *The international journal of behavioral nutrition and physical activity*. 2015;12:77. Epub 2015/06/20. doi: 10.1186/s12966-015-0245-x. PubMed PMID: 26088561; PubMed Central PMCID: PMC4479354.
59. Hjorth MF, Chaput JP, Michaelsen K, Astrup A, Tetens I, Sjoedin A. Seasonal variation in objectively measured physical activity, sedentary time, cardio-respiratory fitness and sleep duration among 8-11 year-old Danish children: a repeated-measures study. *BMC public health*. 2013;13:808. Epub 2013/09/10. doi: 10.1186/1471-2458-13-808. PubMed PMID: 24010811; PubMed Central PMCID: PMC3846279.
60. Carson V, Salmon J, Crawford D, Hinkley T, Hesketh KD. Longitudinal levels and bouts of objectively measured sedentary time among young Australian children in the HAPPY study. *Journal of science and medicine in sport / Sports Medicine Australia*. 2016;19(3):232-6. Epub 2015/02/17. doi: 10.1016/j.jsams.2015.01.009. PubMed PMID: 25683731.
61. Kim J, Nakamura T, Kikuchi H, Yoshiuchi K, Sasaki T, Yamamoto Y. Covariation of depressive mood and spontaneous physical activity in major depressive disorder: toward continuous monitoring of depressive mood. *IEEE journal of biomedical and health informatics*. 2015;19(4):1347-55. Epub 2015/06/09. doi: 10.1109/jbhi.2015.2440764. PubMed PMID: 26054079.
62. Hawkins M, Pekow P, Chasan-Taber L. Physical activity, sedentary behavior, and C-reactive protein in pregnancy. *Medicine and science in sports and exercise*. 2014;46(2):284-92. Epub 2013/07/19. doi: 10.1249/MSS.0b013e3182a44767. PubMed PMID: 23860417.
63. Dallal CM, Brinton LA, Matthews CE, Pfeiffer RM, Hartman TJ, Lissowska J, et al. Association of Active and Sedentary Behaviors with Postmenopausal Estrogen Metabolism. *Medicine and science in sports and exercise*. 2016;48(3):439-48. Epub 2015/10/16. doi: 10.1249/mss.0000000000000790. PubMed PMID: 26460631; PubMed Central PMCID: PMC4861700.
64. Albright CL, Steffen AD, Wilkens LR, White KK, Novotny R, Nigg CR, et al. Effectiveness of a 12-month randomized clinical trial to increase physical activity in multiethnic postpartum women: results from Hawaii's Na Mikimiki Project. *Preventive medicine*. 2014;69:214-23. Epub 2014/10/07. doi: 10.1016/j.ypmed.2014.09.019. PubMed PMID: 25285751; PubMed Central PMCID: PMC4312232.
65. Rondanelli M, Opizzi A, Monteferrario F, Antoniello N, Manni R, Klersy C. The effect of melatonin, magnesium, and zinc on primary insomnia in long-term care facility residents in Italy: a double-blind, placebo-controlled clinical trial. *Journal of the American Geriatrics Society*. 2011;59(1):82-90. Epub 2011/01/14. doi: 10.1111/j.1532-5415.2010.03232.x. PubMed PMID: 21226679.
