# Supplementary material
Source: publisher figshare collection journal article supplement (https://karger.figshare.com/articles/dataset/_/5841519)
Supplement: Supplementary file 1 [file 1 › 486347sm_2.pdf]

**Supplemental Table    Mobile sleep outcomes**

| Therapeutic Area                                                               | Technology                                      | Position of device                            | Epochs        | Study design                 | Type of clinical study | Other mobile outcomes                        | Other standard outcome assessment                                                                        | Use of mobile outcomes | Objectives                                                                                                                                                                                                              | Source              |
|--------------------------------------------------------------------------------|-------------------------------------------------|-----------------------------------------------|---------------|------------------------------|------------------------|----------------------------------------------|----------------------------------------------------------------------------------------------------------|------------------------|-------------------------------------------------------------------------------------------------------------------------------------------------------------------------------------------------------------------------|---------------------|
| Cardiology (Heart Failure)                                                     | Pressure sensor (EverOn)                        | Not Attached to the Body (Under the mattress) | Not specified | Observational (Cohort study) | Prevention             | Cardiac (Biomarker)<br>Breathing (Biomarker) | Cardiometabolic and anthropometric measures (ClinRO)<br>Cardiac (PRO, ClinRO, and ObsRO)                 | Exploratory endpoint   | To assess normal and altered physiological patterns in the home environment, and to determine if altered physiological patterns correlate with hospital readmissions.                                                   | Bennett 2015 [1]    |
| Nutrition (Vitamin D)<br>Sleep                                                 | Inertial sensor (Sleep-watch-O)                 | Wrist (Non-dominant)                          | 60 seconds    | Observational (Cohort study) | Epidemiological        | NA                                           | Physical activity (PerfO, ClinRO)<br>Psychosocial (PRO, ClinRO)<br>Sleep (PRO, Biomarkers)               | Co-Prim Endpoint       | To examine whether levels of serum 25(OH)D are associated with objective measures of sleep in older men.                                                                                                                | Massa 2015 [2]      |
| Pediatrics (Adolescent Physical Activity)<br>Sleep                             | Inertial sensor (ActiGraph GT3X+ accelerometer) | Waist (Right hip)                             | 60 seconds    | Observational (Cohort study) | Epidemiological        | Physical activity (PerfO)                    | Cardiometabolic and anthropometric measures (ClinRO)<br>Physical activity (ClinRO)<br>Sleep (PRO, ObsRO) | Co-Prim Endpoint       | To examine between-season and within-week variation in physical activity, sedentary behavior, cardio-respiratory fitness and sleep duration among 8–11 year-old children.                                               | Hjorth 2013 [3]     |
| Psychology (Behavioral or Emotional Difficulties, Neurobehavioral Functioning) | Inertial sensor (Somnowatch)                    | Wrist (Non-dominant)                          | Not specified | Observational (Cohort study) | Epidemiological        | NA                                           | Psychosocial (ClinRO, ObsRO)<br>Sleep (ObsRO, Biomarkers)                                                | Exploratory endpoint   | To investigate the relation between objectively assessed sleep patterns, HPA system, and behavioral/emotional difficulties in preschoolers.                                                                             | Hatzinger 2010 [4]  |
| Sleep                                                                          | Inertial sensor (ActiSleep sleep monitor)       | Wrist (Dominant)                              | 60 seconds    | Observational (Cohort study) | Diagnostic             | NA                                           | Sleep (PerfO, PRO)                                                                                       | Exploratory endpoint   | To investigate the relationships between sleep measured by wrist actigraphy, visuospatial motor skill learning and measures of cortical excitability in response to one training episode in young, healthy individuals. | Borich 2012 [5]     |
| Sleep                                                                          | Inertial sensor (Actiwatch-L)                   | Wrist                                         | Not specified | Interventional (RCT)         | Quality of life        | NA                                           | Sleep (Biomarkers, PRO)                                                                                  | Co-Prim Endpoint       | To evaluate, in rotating workers, the impact of a circadian-aimed short wavelengths controlled strategy on both the performance at work and circadian clock adaptation to the night shift.                              | Sasseville 2010 [6] |
| Sleep (Children with bladder disorders)                                        | Inertial sensor (Miniature Actigraph)           | Wrist (Non-dominant)                          | Not specified | Observational (Case control) | Quality of life        | NA                                           | Psychosocial (ObsRO)<br>Sleep (ObsRO, PRO)                                                               | Co-Prim Endpoint       | To assess the association between night diapers use and sleep quality of school-aged children with enuresis.                                                                                                            | Kushnir 2013 [7]    |

|                                                                  |                                                                   |                                   |               |                              |                 |                           |                                                                                                                 |                      |                                                                                                                                                                                      |                      |
|------------------------------------------------------------------|-------------------------------------------------------------------|-----------------------------------|---------------|------------------------------|-----------------|---------------------------|-----------------------------------------------------------------------------------------------------------------|----------------------|--------------------------------------------------------------------------------------------------------------------------------------------------------------------------------------|----------------------|
| Sleep (Circadian Rhythm)                                         | Inertial sensor and light meter (Daysimeter-D)                    | Head (Attached to Glasses), Wrist | Not specified | Observational (Case control) | Quality of life | NA                        | Sleep (Biomarker, PRO)                                                                                          | Exploratory endpoint | To examine if light–dark exposure patterns determine circadian phase and not the sleep schedule.                                                                                     | Appleman 2013 [8]    |
| Sleep (Insomnia)                                                 | Inertial sensor (Actiwatch 2)                                     | Wrist (Non-dominant)              | Not specified | Interventional (RCT)         | Quality of life | NA                        | Psychosocial (PRO, ClinRO)<br>Sleep (PRO, ClinRO)                                                               | Secondary endpoint   | To explore the impact of CBTI on sleep discrepancy in older adults during in-home sleep using actigraphy in relation to changes in perceived insomnia severity.                      | Kay 2015 [9]         |
| Sleep (Insomnia)                                                 | Inertial sensor (SenseWear Armband)                               | Arm (Non-Dominant Upper)          | Not specified | Interventional (RCT)         | Quality of life | Physical activity (PerFO) | Psychosocial (PRO, ClinCRO)<br>Sleep (PerFO, PRO, ClinRO)<br>General health history (PRO)<br>Sleep (ObsRO, PRO) | Secondary endpoint   | To determine whether nightly administration of melatonin, magnesium, and zinc improves primary insomnia in long-term care facility residents, aged 70 and older.                     | Rondanelli 2011 [10] |
| Sleep (Sleep quality and fatigue among patients living with HIV) | Inertial sensor (Actiware-Sleep 3.4, Actiwatch actigraphy device) | Wrist (Non-dominant)              | Not specified | Observational (Cohort study) | Quality of life | NA                        | Sleep (ObsRO, PRO)                                                                                              | Secondary endpoint   | To assess total sleep time and wake after sleep onset, using objective sleep data as measured by an Actiwatch in a sample of Chinese HIV+ women after they learned of their disease. | Chen 2013 [11]       |

PerFO = Performance Outcome; ObsRO = Observer Reported Outcome; PRO = Patient Reported Outcome; ClinRO = Clinician Reported Outcome

## References

1. Bennett MK, Shao M, Gorodeski EZ. Home monitoring of heart failure patients at risk for hospital readmission using a novel under-the-mattress piezoelectric sensor: A preliminary single centre experience. *Journal of telemedicine and telecare*. 2015. Epub 2015/12/17. doi: 10.1177/1357633x15618810. PubMed PMID: 26670209.
2. Massa J, Stone KL, Wei EK, Harrison SL, Barrett-Connor E, Lane NE, et al. Vitamin D and actigraphic sleep outcomes in older community-dwelling men: the MrOS sleep study. *Sleep*. 2015;38(2):251-7. Epub 2015/01/13. doi: 10.5665/sleep.4408. PubMed PMID: 25581929; PubMed Central PMCID: PMC4288606.
3. Hjorth MF, Chaput JP, Michaelsen K, Astrup A, Tetens I, Sjodin A. Seasonal variation in objectively measured physical activity, sedentary time, cardio-respiratory fitness and sleep duration among 8-11 year-old Danish children: a repeated-measures study. *BMC public health*. 2013;13:808. Epub 2013/09/10. doi: 10.1186/1471-2458-13-808. PubMed PMID: 24010811; PubMed Central PMCID: PMC3846279.
4. Hatzinger M, Brand S, Perren S, Stadelmann S, von Wyl A, von Klitzing K, et al. Sleep actigraphy pattern and behavioral/emotional difficulties in kindergarten children: association with hypothalamic-pituitary-adrenocortical (HPA) activity. *Journal of psychiatric research*. 2010;44(4):253-61. Epub 2009/09/19. doi: 10.1016/j.jpsychires.2009.08.012. PubMed PMID: 19762039.
5. Borich MR, Kimberley TJ. Using actigraphy and transcranial magnetic stimulation to assess the relationship between sleep and visuomotor skill learning. *Restorative neurology and neuroscience*. 2012;30(2):81-90. Epub 2011/11/30. doi: 10.3233/rnn-2011-0622. PubMed PMID: 22124036.
6. Sasseville A, Hebert M. Using blue-green light at night and blue-blockers during the day to improve adaptation to night work: a pilot study. *Progress in neuro-psychopharmacology & biological psychiatry*. 2010;34(7):1236-42. Epub 2010/07/06. doi: 10.1016/j.pnpbp.2010.06.027. PubMed PMID: 20599459.
7. Kushnir J, Cohen-Zrubavel V, Kushnir B. Night diapers use and sleep in children with enuresis. *Sleep medicine*. 2013;14(10):1013-6. Epub 2013/07/31. doi: 10.1016/j.sleep.2013.02.018. PubMed PMID: 23890954.

8. Appleman K, Figueiro MG, Rea MS. Controlling light-dark exposure patterns rather than sleep schedules determines circadian phase. *Sleep medicine*. 2013;14(5):456-61. Epub 2013/03/14. doi: 10.1016/j.sleep.2012.12.011. PubMed PMID: 23481485; PubMed Central PMCID: PMC4304650.
9. Kay DB, Buysse DJ, Germain A, Hall M, Monk TH. Subjective-objective sleep discrepancy among older adults: associations with insomnia diagnosis and insomnia treatment. *Journal of sleep research*. 2015;24(1):32-9. Epub 2014/09/16. doi: 10.1111/jsr.12220. PubMed PMID: 25219802; PubMed Central PMCID: PMC4747029.
10. Rondanelli M, Opizzi A, Monteferrario F, Antonello N, Manni R, Klersy C. The effect of melatonin, magnesium, and zinc on primary insomnia in long-term care facility residents in Italy: a double-blind, placebo-controlled clinical trial. *Journal of the American Geriatrics Society*. 2011;59(1):82-90. Epub 2011/01/14. doi: 10.1111/j.1532-5415.2010.03232.x. PubMed PMID: 21226679.
11. Chen WT, Lee SY, Shiu CS, Simoni JM, Pan C, Bao M, et al. Fatigue and sleep disturbance in HIV-positive women: a qualitative and biomedical approach. *Journal of clinical nursing*. 2013;22(9-10):1262-9. Epub 2013/01/03. doi: 10.1111/jocn.12012. PubMed PMID: 23279292; PubMed Central PMCID: PMC43625469.
