# Supplementary material
Source: publisher figshare collection journal article supplement (https://karger.figshare.com/articles/dataset/_/5841519)
Supplement: Supplementary file 1 [file 1 › 486347sm_3.pdf]

**Supplemental Table    Mobile respiration biomarkers**

| Therapeutic Area           | Technology               | Position of device                            | Epochs        | Study design                 | Type of clinical study | Other mobile outcomes             | Other standard outcome assessment                                                     | Use of mobile outcomes | Objectives                                                                                                                                                            | Source           |
|----------------------------|--------------------------|-----------------------------------------------|---------------|------------------------------|------------------------|-----------------------------------|---------------------------------------------------------------------------------------|------------------------|-----------------------------------------------------------------------------------------------------------------------------------------------------------------------|------------------|
| Cardiology (Heart Failure) | Pressure sensor (EverOn) | Not Attached to the Body (Under the mattress) | Not specified | Observational (Cohort study) | Prevention             | Sleep (PerFO) Cardiac (Biomarker) | Cardiometabolic and anthropometric measures (ClinRO) Cardiac (PRO, ClinRO, and ObsRO) | Exploratory endpoint   | To assess normal and altered physiological patterns in the home environment, and to determine if altered physiological patterns correlate with hospital readmissions. | Bennett 2015 [1] |

PerFO = Performance Outcome; ObsRO = Observer Reported Outcome; PRO = Patient Reported Outcome; ClinRO = Clinician Reported Outcome

## References

1. Bennett MK, Shao M, Gorodeski EZ. Home monitoring of heart failure patients at risk for hospital readmission using a novel under-the-mattress piezoelectric sensor: A preliminary single centre experience. Journal of telemedicine and telecare. 2015. Epub 2015/12/17. doi: 10.1177/1357633x15618810. PubMed PMID: 26670209.
