# Supplementary material
Source: publisher figshare collection journal article supplement (https://karger.figshare.com/articles/dataset/_/5841519)
Supplement: Supplementary file 1 [file 1 › 486347sm_5.pdf]

### Use of mobile outcomes in clinical research.

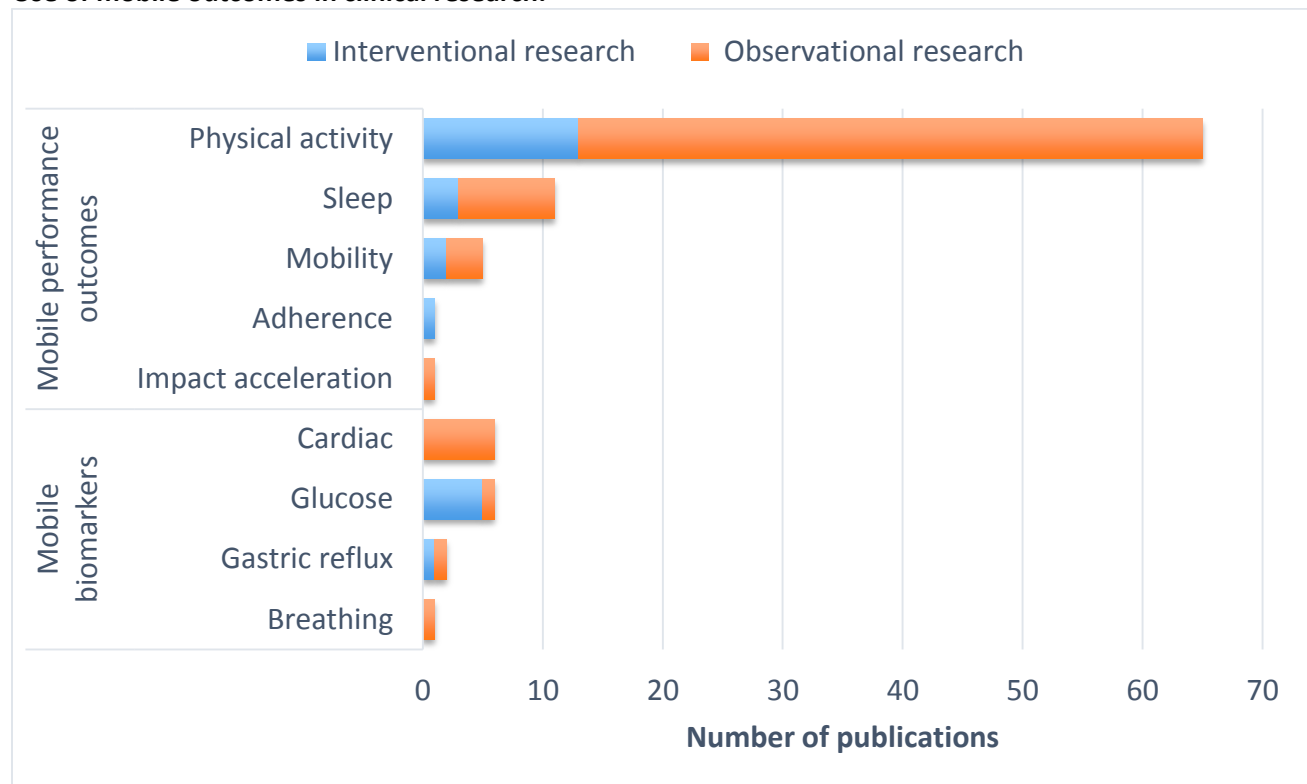

### Citations for figure

| Mobile outcome categories          | Interventional research | Observational research |
|------------------------------------|-------------------------|------------------------|
| <b>Mobile performance outcomes</b> |                         |                        |
| Physical activity                  | [1-13]                  | [14-65]                |
| Sleep                              | [12, 66, 67]            | [41, 68-74]            |
| Mobility                           | [7, 13]                 | [27, 52, 65]           |
| Impact acceleration                | -                       | [75]                   |
| Adherence                          | [76]                    | -                      |
| <b>Mobile biomarkers</b>           |                         |                        |
| Cardiac                            | -                       | [60, 69, 77-80]        |
| Glucose                            | [81-85]                 | [86]                   |
| Gastric reflux                     | [87]                    | [88]                   |
| Breathing                          | -                       | [69]                   |

### References

1. Murphy SL, Lyden AK, Clary M, Geisser ME, Yung RL, Clauw DJ, et al. Activity pacing for osteoarthritis symptom management: study design and methodology of a randomized trial testing a tailored clinical approach using accelerometers for veterans and non-veterans. BMC musculoskeletal

disorders. 2011;12:177. Epub 2011/08/04. doi: 10.1186/1471-2474-12-177. PubMed PMID: 21810253; PubMed Central PMCID: PMC3162944.

2. Phillips SM, McAuley E. Physical activity and fatigue in breast cancer survivors: a panel model examining the role of self-efficacy and depression. *Cancer epidemiology, biomarkers & prevention : a publication of the American Association for Cancer Research, cosponsored by the American Society of Preventive Oncology*. 2013;22(5):773-81. Epub 2013/03/05. doi: 10.1158/1055-9965.epi-12-0983. PubMed PMID: 23456557; PubMed Central PMCID: PMC3650084.

3. van der Meij BS, Langius JA, Spreeuwenberg MD, Slootmaker SM, Paul MA, Smit EF, et al. Oral nutritional supplements containing n-3 polyunsaturated fatty acids affect quality of life and functional status in lung cancer patients during multimodality treatment: an RCT. *European journal of clinical nutrition*. 2012;66(3):399-404. Epub 2012/01/12. doi: 10.1038/ejcn.2011.214. PubMed PMID: 22234041; PubMed Central PMCID: PMC3303137.

4. Albright CL, Steffen AD, Wilkens LR, White KK, Novotny R, Nigg CR, et al. Effectiveness of a 12-month randomized clinical trial to increase physical activity in multiethnic postpartum women: results from Hawaii's Na Mikimiki Project. *Preventive medicine*. 2014;69:214-23. Epub 2014/10/07. doi: 10.1016/j.ypmed.2014.09.019. PubMed PMID: 25285751; PubMed Central PMCID: PMC3431223.

5. Biloft-Jensen A, Hjorth MF, Trolle E, Christensen T, Brockhoff PB, Andersen LF, et al. Comparison of estimated energy intake using Web-based Dietary Assessment Software with accelerometer-determined energy expenditure in children. *Food & nutrition research*. 2013;57. Epub 2013/12/21. doi: 10.3402/fnr.v57i0.21434. PubMed PMID: 24358037; PubMed Central PMCID: PMC3867750.

6. English C, Healy GN, Coates A, Lewis L, Olds T, Bernhardt J. Sitting and Activity Time in People With Stroke. *Physical therapy*. 2016;96(2):193-201. Epub 2015/06/27. doi: 10.2522/ptj.20140522. PubMed PMID: 26112254.

7. Ginis P, Nieuwboer A, Dorfman M, Ferrari A, Gazit E, Canning CG, et al. Feasibility and effects of home-based smartphone-delivered automated feedback training for gait in people with Parkinson's disease: A pilot randomized controlled trial. *Parkinsonism & related disorders*. 2016;22:28-34. Epub 2016/01/19. doi: 10.1016/j.parkreldis.2015.11.004. PubMed PMID: 26777408.

8. Hartman SJ, Natarajan L, Palmer BW, Parker B, Patterson RE, Sears DD. Impact of increasing physical activity on cognitive functioning in breast cancer survivors: Rationale and study design of Memory & Motion. *Contemporary clinical trials*. 2015;45(Pt B):371-6. Epub 2015/10/03. doi: 10.1016/j.cct.2015.09.021. PubMed PMID: 26427563; PubMed Central PMCID: PMC34674350.

9. Panza GA, Taylor BA, Thompson PD, Erhard L, Capizzi JA, Grimaldi AS, et al. The Effect of Atorvastatin on Habitual Physical Activity among Healthy Adults. *Medicine and science in sports and exercise*. 2016;48(1):1-6. Epub 2015/07/22. doi: 10.1249/mss.0000000000000740. PubMed PMID: 26197031; PubMed Central PMCID: PMC34681632.

10. Pulakka A, Ashorn U, Cheung YB, Dewey KG, Maleta K, Vosti SA, et al. Effect of 12-month intervention with lipid-based nutrient supplements on physical activity of 18-month-old Malawian children: a randomised, controlled trial. *European journal of clinical nutrition*. 2015;69(2):173-8. Epub 2014/07/17. doi: 10.1038/ejcn.2014.138. PubMed PMID: 25028082.

11. Redfield MM, Anstrom KJ, Levine JA, Koepp GA, Borlaug BA, Chen HH, et al. Isosorbide Mononitrate in Heart Failure with Preserved Ejection Fraction. *The New England journal of medicine*. 2015;373(24):2314-24. Epub 2015/11/10. doi: 10.1056/NEJMoa1510774. PubMed PMID: 26549714; PubMed Central PMCID: PMC34712067.

12. Rondanelli M, Opizzi A, Monteferrario F, Antonello N, Manni R, Klersy C. The effect of melatonin, magnesium, and zinc on primary insomnia in long-term care facility residents in Italy: a double-blind, placebo-controlled clinical trial. *Journal of the American Geriatrics Society*. 2011;59(1):82-90. Epub 2011/01/14. doi: 10.1111/j.1532-5415.2010.03232.x. PubMed PMID: 21226679.

13. Taraldsen K, Sletvold O, Thingstad P, Saltvedt I, Granat MH, Lydersen S, et al. Physical behavior and function early after hip fracture surgery in patients receiving comprehensive geriatric care or orthopedic care--a randomized controlled trial. *The journals of gerontology Series A, Biological sciences and medical sciences*. 2014;69(3):338-45. Epub 2013/08/02. doi: 10.1093/gerona/glt097. PubMed PMID: 23902933.
14. Alosco ML, Spitznagel MB, Cohen R, Raz N, Sweet LH, Josephson R, et al. Decreased physical activity predicts cognitive dysfunction and reduced cerebral blood flow in heart failure. *Journal of the neurological sciences*. 2014;339(1-2):169-75. Epub 2014/03/04. doi: 10.1016/j.jns.2014.02.008. PubMed PMID: 24581672; PubMed Central PMCID: PMC4009239.
15. Bell JA, Hamer M, van Hees VT, Singh-Manoux A, Kivimaki M, Sabia S. Healthy obesity and objective physical activity. *The American journal of clinical nutrition*. 2015;102(2):268-75. Epub 2015/07/15. doi: 10.3945/ajcn.115.110924. PubMed PMID: 26156738; PubMed Central PMCID: PMC4515867.
16. Buijs DM, Ramadi A, MacDonald K, Lightfoot R, Senaratne M, Haennel RG. Quantity and Quality of Daily Physical Activity in Older Cardiac Patients. *Canadian journal of cardiovascular nursing = Journal canadien en soins infirmiers cardio-vasculaires*. 2015;25(3):10-6. Epub 2015/09/22. PubMed PMID: 26387271.
17. Cadmus-Bertram L, Marcus BH, Patterson RE, Parker BA, Morey BL. Use of the Fitbit to Measure Adherence to a Physical Activity Intervention Among Overweight or Obese, Postmenopausal Women: Self-Monitoring Trajectory During 16 Weeks. *JMIR mHealth and uHealth*. 2015;3(4):e96. Epub 2015/11/21. doi: 10.2196/mhealth.4229. PubMed PMID: 26586418; PubMed Central PMCID: PMC4705008.
18. Camhi SM, Crouter SE, Hayman LL, Must A, Lichtenstein AH. Lifestyle Behaviors in Metabolically Healthy and Unhealthy Overweight and Obese Women: A Preliminary Study. *PLoS one*. 2015;10(9):e0138548. Epub 2015/09/19. doi: 10.1371/journal.pone.0138548. PubMed PMID: 26383251; PubMed Central PMCID: PMC4575188.
19. Carson V, Salmon J, Crawford D, Hinkley T, Hesketh KD. Longitudinal levels and bouts of objectively measured sedentary time among young Australian children in the HAPPY study. *Journal of science and medicine in sport / Sports Medicine Australia*. 2016;19(3):232-6. Epub 2015/02/17. doi: 10.1016/j.jsams.2015.01.009. PubMed PMID: 25683731.
20. Ceroni D, Martin X, Lamah L, Delhumeau C, Farpour-Lambert N, De Coulon G, et al. Recovery of physical activity levels in adolescents after lower limb fractures: a longitudinal, accelerometry-based activity monitor study. *BMC musculoskeletal disorders*. 2012;13:131. Epub 2012/07/27. doi: 10.1186/1471-2474-13-131. PubMed PMID: 22831387; PubMed Central PMCID: PMC3414777.
21. Cichosz SL, Fleischer J, Hoeyem P, Laugesen E, Poulsen PL, Christiansen JS, et al. Objective measurements of activity patterns in people with newly diagnosed Type 2 diabetes demonstrate a sedentary lifestyle. *Diabetic medicine : a journal of the British Diabetic Association*. 2013;30(9):1063-6. Epub 2013/04/23. doi: 10.1111/dme.12199. PubMed PMID: 23600518.
22. Cupisti A, Capitanini A, Betti G, D'Alessandro C, Barsotti G. Assessment of habitual physical activity and energy expenditure in dialysis patients and relationships to nutritional parameters. *Clinical nephrology*. 2011;75(3):218-25. Epub 2011/02/19. PubMed PMID: 21329632.
23. Dallal CM, Brinton LA, Matthews CE, Pfeiffer RM, Hartman TJ, Lissowska J, et al. Association of Active and Sedentary Behaviors with Postmenopausal Estrogen Metabolism. *Medicine and science in sports and exercise*. 2016;48(3):439-48. Epub 2015/10/16. doi: 10.1249/mss.0000000000000790. PubMed PMID: 26460631; PubMed Central PMCID: PMC4861700.
24. Desveaux L, Goldstein RS, Mathur S, Hassan A, Devlin M, Pauley T, et al. Physical Activity in Adults with Diabetes Following Prosthetic Rehabilitation. *Canadian journal of diabetes*. 2016. Epub 2016/04/08. doi: 10.1016/j.jcjd.2016.02.003. PubMed PMID: 27052673.

25. Ehsan M, Khan R, Wakefield D, Qureshi A, Murray L, Zuwallack R, et al. A longitudinal study evaluating the effect of exacerbations on physical activity in patients with chronic obstructive pulmonary disease. *Annals of the American Thoracic Society*. 2013;10(6):559-64. Epub 2013/09/24. doi: 10.1513/AnnalsATS.201304-100OC. PubMed PMID: 24053416.
26. Eliason G, Zakrisson AB, Piehl-Aulin K, Hurtig-Wennlof A. Physical activity patterns in patients in different stages of chronic obstructive pulmonary disease. *Copd*. 2011;8(5):369-74. Epub 2011/09/08. doi: 10.3109/15412555.2011.605403. PubMed PMID: 21895516.
27. English C, Healy GN, Coates A, Lewis LK, Olds T, Bernhardt J. Sitting time and physical activity after stroke: physical ability is only part of the story. *Topics in stroke rehabilitation*. 2016;23(1):36-42. Epub 2015/08/11. doi: 10.1179/1945511915y.0000000009. PubMed PMID: 26257146.
28. English C, Healy GN, Olds T, Parfitt G, Borkoles E, Coates A, et al. Reducing Sitting Time After Stroke: A Phase II Safety and Feasibility Randomized Controlled Trial. *Archives of physical medicine and rehabilitation*. 2016;97(2):273-80. Epub 2015/11/04. doi: 10.1016/j.apmr.2015.10.094. PubMed PMID: 26529471.
29. Ewalt LA, Danduran MJ, Strath SJ, Moerchen V, Swartz AM. Objectively assessed physical activity and sedentary behaviour does not differ between children and adolescents with and without a congenital heart defect: a pilot examination. *Cardiology in the young*. 2012;22(1):34-41. Epub 2011/07/07. doi: 10.1017/s1047951111000837. PubMed PMID: 21729504.
30. Filipovic Grcic P, Matijaca M, Lusic I, Capkun V. Responsiveness of walking-based outcome measures after multiple sclerosis relapses following steroid pulses. *Medical science monitor : international medical journal of experimental and clinical research*. 2011;17(12):Cr704-10. Epub 2011/12/02. PubMed PMID: 22129902; PubMed Central PMCID: PMC3628135.
31. Fisher SR, Goodwin JS, Protas EJ, Kuo YF, Graham JE, Ottenbacher KJ, et al. Ambulatory activity of older adults hospitalized with acute medical illness. *Journal of the American Geriatrics Society*. 2011;59(1):91-5. Epub 2010/12/17. doi: 10.1111/j.1532-5415.2010.03202.x. PubMed PMID: 21158744; PubMed Central PMCID: PMC3133455.
32. Fokkenrood HJ, Lauret GJ, Verhofstad N, Bendermacher BL, Scheltinga MR, Teijink JA. The effect of supervised exercise therapy on physical activity and ambulatory activities in patients with intermittent claudication. *European journal of vascular and endovascular surgery : the official journal of the European Society for Vascular Surgery*. 2015;49(2):184-91. Epub 2014/12/17. doi: 10.1016/j.ejvs.2014.11.002. PubMed PMID: 25496986.
33. Funck KL, Laugesen E, Hoyem P, Fleischer J, Cichosz SL, Christiansen JS, et al. Low Physical Activity Is Associated With Increased Arterial Stiffness in Patients Recently Diagnosed With Type 2 Diabetes. *American journal of hypertension*. 2015. Epub 2015/12/31. doi: 10.1093/ajh/hpv197. PubMed PMID: 26714500.
34. Barone Gibbs B, Pettee Gabriel K, Reis JP, Jakicic JM, Carnethon MR, Sternfeld B. Cross-sectional and longitudinal associations between objectively measured sedentary time and metabolic disease: the Coronary Artery Risk Development in Young Adults (CARDIA) study. *Diabetes care*. 2015;38(10):1835-43. Epub 2015/07/15. doi: 10.2337/dc15-0226. PubMed PMID: 26156528; PubMed Central PMCID: PMC4580607.
35. Gingras V, Vigneault J, Weisnagel SJ, Tchernof A, Robitaille J. Accelerometry-measured physical activity and inflammation after gestational diabetes. *Medicine and science in sports and exercise*. 2013;45(7):1307-12. Epub 2013/03/09. doi: 10.1249/MSS.0b013e318285402b. PubMed PMID: 23470316.
36. Golubic R, Wijndaele K, Sharp SJ, Simmons RK, Griffin SJ, Wareham NJ, et al. Physical activity, sedentary time and gain in overall and central body fat: 7-year follow-up of the ProActive trial cohort. *International journal of obesity (2005)*. 2015;39(1):142-8. Epub 2014/04/16. doi: 10.1038/ijo.2014.66. PubMed PMID: 24732143; PubMed Central PMCID: PMC4113455.

37. Hamer M, Venuraju SM, Lahiri A, Rossi A, Steptoe A. Objectively assessed physical activity, sedentary time, and coronary artery calcification in healthy older adults. *Arteriosclerosis, thrombosis, and vascular biology*. 2012;32(2):500-5. Epub 2011/11/15. doi: 10.1161/atvbaha.111.236877. PubMed PMID: 22075247.
38. Hashimoto T, Yoshiuchi K, Inada S, Shirakura K, Wada N, Takeuchi K, et al. Physical activity of elderly patients with rheumatoid arthritis and healthy individuals: an actigraphy study. *BioPsychoSocial medicine*. 2015;9:19. Epub 2015/10/07. doi: 10.1186/s13030-015-0046-0. PubMed PMID: 26442128; PubMed Central PMCID: PMC4593190.
39. Hawkins M, Pekow P, Chasan-Taber L. Physical activity, sedentary behavior, and C-reactive protein in pregnancy. *Medicine and science in sports and exercise*. 2014;46(2):284-92. Epub 2013/07/19. doi: 10.1249/MSS.0b013e3182a44767. PubMed PMID: 23860417.
40. Hayes L, McParlin C, Kinnunen TI, Poston L, Robson SC, Bell R. Change in level of physical activity during pregnancy in obese women: findings from the UPBEAT pilot trial. *BMC pregnancy and childbirth*. 2015;15:52. Epub 2015/04/18. doi: 10.1186/s12884-015-0479-2. PubMed PMID: 25886590; PubMed Central PMCID: PMC4352291.
41. Hjorth MF, Chaput JP, Michaelsen K, Astrup A, Tetens I, Sjodin A. Seasonal variation in objectively measured physical activity, sedentary time, cardio-respiratory fitness and sleep duration among 8-11 year-old Danish children: a repeated-measures study. *BMC public health*. 2013;13:808. Epub 2013/09/10. doi: 10.1186/1471-2458-13-808. PubMed PMID: 24010811; PubMed Central PMCID: PMC3846279.
42. Ilich SS, Dempsey AR, Mills PM, Sturnieks DL, Stachowiak GW, Maguire KF, et al. Physical activity patterns and function 3 months after arthroscopic partial meniscectomy. *Journal of science and medicine in sport / Sports Medicine Australia*. 2013;16(3):195-9. Epub 2012/09/12. doi: 10.1016/j.jsams.2012.08.007. PubMed PMID: 22964451.
43. Itoi A, Yamada Y, Watanabe Y, Kimura M. Physical activity, energy intake, and obesity prevalence among urban and rural schoolchildren aged 11-12 years in Japan. *Applied physiology, nutrition, and metabolism = Physiologie appliquee, nutrition et metabolisme*. 2012;37(6):1189-99. Epub 2012/11/28. doi: 10.1139/h2012-100. PubMed PMID: 23176526.
44. Jakicic JM, Gregg E, Knowler W, Kelley DE, Lang W, Miller GD, et al. Activity patterns of obese adults with type 2 diabetes in the look AHEAD study. *Medicine and science in sports and exercise*. 2010;42(11):1995-2005. Epub 2010/04/14. doi: 10.1249/MSS.0b013e3181e054f0. PubMed PMID: 20386337; PubMed Central PMCID: PMC4593190.
45. Janaudis-Ferreira T, Mathur S, Romano JM, Goldstein RS, Brooks D. Arm Activity During Daily Life in Individuals With Chronic Obstructive Pulmonary Disease. *Journal of cardiopulmonary rehabilitation and prevention*. 2016;36(2):125-31. Epub 2015/10/16. doi: 10.1097/hcr.0000000000000153. PubMed PMID: 26468630.
46. Janney CA, Ganguli R, Richardson CR, Holleman RG, Tang G, Cauley JA, et al. Sedentary behavior and psychiatric symptoms in overweight and obese adults with schizophrenia and schizoaffective disorders (WAIST Study). *Schizophrenia research*. 2013;145(1-3):63-8. Epub 2013/02/16. doi: 10.1016/j.schres.2013.01.010. PubMed PMID: 23410710; PubMed Central PMCID: PMC3836608.
47. Jefferis BJ, Sartini C, Lee IM, Choi M, Amuzu A, Gutierrez C, et al. Adherence to physical activity guidelines in older adults, using objectively measured physical activity in a population-based study. *BMC public health*. 2014;14:382. Epub 2014/04/22. doi: 10.1186/1471-2458-14-382. PubMed PMID: 24745369; PubMed Central PMCID: PMC4021412.
48. Jefferis BJ, Merom D, Sartini C, Wannamethee SG, Ash S, Lennon LT, et al. Physical Activity and Falls in Older Men: The Critical Role of Mobility Limitations. *Medicine and science in sports and exercise*. 2015;47(10):2119-28. Epub 2015/02/11. doi: 10.1249/mss.0000000000000635. PubMed PMID: 25668406.

49. Jefferis BJ, Sartini C, Ash S, Lennon LT, Wannamethee SG, Lee IM, et al. Trajectories of objectively measured physical activity in free-living older men. *Medicine and science in sports and exercise*. 2015;47(2):343-9. Epub 2014/07/06. doi: 10.1249/mss.0000000000000410. PubMed PMID: 24988411; PubMed Central PMCID: PMC4281510.
50. Jefferis BJ, Sartini C, Shiroma E, Whincup PH, Wannamethee SG, Lee IM. Duration and breaks in sedentary behaviour: accelerometer data from 1566 community-dwelling older men (British Regional Heart Study). *British journal of sports medicine*. 2015;49(24):1591-4. Epub 2014/09/19. doi: 10.1136/bjsports-2014-093514. PubMed PMID: 25232029; PubMed Central PMCID: PMC4363289.
51. Klenk J, Denkinger M, Nikolaus T, Peter R, Rothenbacher D, Koenig W. Association of objectively measured physical activity with established and novel cardiovascular biomarkers in elderly subjects: every step counts. *Journal of epidemiology and community health*. 2013;67(2):194-7. Epub 2012/08/30. doi: 10.1136/jech-2012-201312. PubMed PMID: 22930799.
52. Klenk J, Kerse N, Rapp K, Nikolaus T, Becker C, Rothenbacher D, et al. Physical Activity and Different Concepts of Fall Risk Estimation in Older People--Results of the ActiFE-Ulm Study. *PloS one*. 2015;10(6):e0129098. Epub 2015/06/10. doi: 10.1371/journal.pone.0129098. PubMed PMID: 26058056; PubMed Central PMCID: PMC4461251.
53. Klenk J, Dallmeier D, Denkinger MD, Rapp K, Koenig W, Rothenbacher D. Objectively Measured Walking Duration and Sedentary Behaviour and Four-Year Mortality in Older People. *PloS one*. 2016;11(4):e0153779. Epub 2016/04/16. doi: 10.1371/journal.pone.0153779. PubMed PMID: 27082963; PubMed Central PMCID: PMC4833405.
54. Kroemeke A, Zajac-Gawlak I, Pospiech D, Gaba A, Pridalova M, Pelclova J. Postmenopausal obesity: 12,500 steps per day as a remedy? Relationships between body composition and daily steps in postmenopausal women. *Przegląd menopauzalny = Menopause review*. 2014;13(4):227-32. Epub 2015/09/04. doi: 10.5114/pm.2014.44998. PubMed PMID: 26327859; PubMed Central PMCID: PMC4520368.
55. Ku PW, Fox KR, Liao Y, Sun WJ, Chen LJ. Prospective associations of objectively assessed physical activity at different intensities with subjective well-being in older adults. *Quality of life research : an international journal of quality of life aspects of treatment, care and rehabilitation*. 2016. Epub 2016/05/08. doi: 10.1007/s11136-016-1309-3. PubMed PMID: 27153854.
56. Lauret GJ, Fokkenrood HJ, Bendermacher BL, Scheltinga MR, Teijink JA. Physical activity monitoring in patients with intermittent claudication. *European journal of vascular and endovascular surgery : the official journal of the European Society for Vascular Surgery*. 2014;47(6):656-63. Epub 2014/04/17. doi: 10.1016/j.ejvs.2014.03.001. PubMed PMID: 24735778.
57. Mai A, Bloch A, Klaassen-Mielke R, Platen P, Hinrichs T. Diurnal profiles of pedometer-determined physical activity in chronically ill and mobility-limited older adults: a cross-sectional study. *BMC public health*. 2014;14:1268. Epub 2014/12/17. doi: 10.1186/1471-2458-14-1268. PubMed PMID: 25495494; PubMed Central PMCID: PMC4320556.
58. Marschollek M. Physical activity event regularity and health outcome - 'Undiscovered country' in cohort accelerometer data. *Studies in health technology and informatics*. 2015;210:657-9. Epub 2015/05/21. PubMed PMID: 25991230.
59. Meeus M, van Eupen I, van Baarle E, De Boeck V, Luyckx A, Kos D, et al. Symptom fluctuations and daily physical activity in patients with chronic fatigue syndrome: a case-control study. *Archives of physical medicine and rehabilitation*. 2011;92(11):1820-6. Epub 2011/10/29. doi: 10.1016/j.apmr.2011.06.023. PubMed PMID: 22032215.
60. Mosconi G, Colombo D, Graziani E, Franceschelli N, Roi GS, Totti V, et al. Physical performance in kidney transplanted patients: a study on desert trekking. *Journal of biological regulators and homeostatic agents*. 2011;25(3):417-25. Epub 2011/10/26. PubMed PMID: 22023766.

61. Kim J, Nakamura T, Kikuchi H, Yoshiuchi K, Sasaki T, Yamamoto Y. Covariation of depressive mood and spontaneous physical activity in major depressive disorder: toward continuous monitoring of depressive mood. *IEEE journal of biomedical and health informatics*. 2015;19(4):1347-55. Epub 2015/06/09. doi: 10.1109/jbhi.2015.2440764. PubMed PMID: 26054079.
62. Prince SA, Blanchard CM, Grace SL, Reid RD. Objectively-measured sedentary time and its association with markers of cardiometabolic health and fitness among cardiac rehabilitation graduates. *European journal of preventive cardiology*. 2016;23(8):818-25. Epub 2015/11/27. doi: 10.1177/2047487315617101. PubMed PMID: 26607698.
63. Ridgers ND, Salmon J, Timperio A. Too hot to move? Objectively assessed seasonal changes in Australian children's physical activity. *The international journal of behavioral nutrition and physical activity*. 2015;12:77. Epub 2015/06/20. doi: 10.1186/s12966-015-0245-x. PubMed PMID: 26088561; PubMed Central PMCID: PMC4479354.
64. Tully MA, Bleakley CM, O'Connor SR, McDonough SM. Functional management of ankle sprains: what volume and intensity of walking is undertaken in the first week postinjury. *British journal of sports medicine*. 2012;46(12):877-82. Epub 2012/01/24. doi: 10.1136/bjsports-2011-090692. PubMed PMID: 22267573.
65. Weiss A, Herman T, Giladi N, Hausdorff JM. Objective assessment of fall risk in Parkinson's disease using a body-fixed sensor worn for 3 days. *PloS one*. 2014;9(5):e96675. Epub 2014/05/08. doi: 10.1371/journal.pone.0096675. PubMed PMID: 24801889; PubMed Central PMCID: PMC4011791.
66. Kay DB, Buysse DJ, Germain A, Hall M, Monk TH. Subjective-objective sleep discrepancy among older adults: associations with insomnia diagnosis and insomnia treatment. *Journal of sleep research*. 2015;24(1):32-9. Epub 2014/09/16. doi: 10.1111/jsr.12220. PubMed PMID: 25219802; PubMed Central PMCID: PMC4747029.
67. Sasseville A, Hebert M. Using blue-green light at night and blue-blockers during the day to improves adaptation to night work: a pilot study. *Progress in neuro-psychopharmacology & biological psychiatry*. 2010;34(7):1236-42. Epub 2010/07/06. doi: 10.1016/j.pnpbp.2010.06.027. PubMed PMID: 20599459.
68. Appleman K, Figueiro MG, Rea MS. Controlling light-dark exposure patterns rather than sleep schedules determines circadian phase. *Sleep medicine*. 2013;14(5):456-61. Epub 2013/03/14. doi: 10.1016/j.sleep.2012.12.011. PubMed PMID: 23481485; PubMed Central PMCID: PMC4304650.
69. Bennett MK, Shao M, Gorodeski EZ. Home monitoring of heart failure patients at risk for hospital readmission using a novel under-the-mattress piezoelectric sensor: A preliminary single centre experience. *Journal of telemedicine and telecare*. 2015. Epub 2015/12/17. doi: 10.1177/1357633x15618810. PubMed PMID: 26670209.
70. Borich MR, Kimberley TJ. Using actigraphy and transcranial magnetic stimulation to assess the relationship between sleep and visuomotor skill learning. *Restorative neurology and neuroscience*. 2012;30(2):81-90. Epub 2011/11/30. doi: 10.3233/rnn-2011-0622. PubMed PMID: 22124036.
71. Chen WT, Lee SY, Shiu CS, Simoni JM, Pan C, Bao M, et al. Fatigue and sleep disturbance in HIV-positive women: a qualitative and biomedical approach. *Journal of clinical nursing*. 2013;22(9-10):1262-9. Epub 2013/01/03. doi: 10.1111/jocn.12012. PubMed PMID: 23279292; PubMed Central PMCID: PMC3625469.
72. Hatzinger M, Brand S, Perren S, Stadelmann S, von Wyl A, von Klitzing K, et al. Sleep actigraphy pattern and behavioral/emotional difficulties in kindergarten children: association with hypothalamic-pituitary-adrenocortical (HPA) activity. *Journal of psychiatric research*. 2010;44(4):253-61. Epub 2009/09/19. doi: 10.1016/j.jpsychires.2009.08.012. PubMed PMID: 19762039.
73. Kushnir J, Cohen-Zrubavel V, Kushnir B. Night diapers use and sleep in children with enuresis. *Sleep medicine*. 2013;14(10):1013-6. Epub 2013/07/31. doi: 10.1016/j.sleep.2013.02.018. PubMed PMID: 23890954.

74. Massa J, Stone KL, Wei EK, Harrison SL, Barrett-Connor E, Lane NE, et al. Vitamin D and actigraphic sleep outcomes in older community-dwelling men: the MrOS sleep study. *Sleep*. 2015;38(2):251-7. Epub 2015/01/13. doi: 10.5665/sleep.4408. PubMed PMID: 25581929; PubMed Central PMCID: PMC4288606.
75. King D, Hume PA, Brughelli M, Gissane C. Instrumented mouthguard acceleration analyses for head impacts in amateur rugby union players over a season of matches. *The American journal of sports medicine*. 2015;43(3):614-24. Epub 2014/12/24. doi: 10.1177/0363546514560876. PubMed PMID: 25535096.
76. Hou MY, Hurwitz S, Kavanagh E, Fortin J, Goldberg AB. Using daily text-message reminders to improve adherence with oral contraceptives: a randomized controlled trial. *Obstetrics and gynecology*. 2010;116(3):633-40. Epub 2010/08/25. doi: 10.1097/AOG.0b013e3181eb6b0f. PubMed PMID: 20733446.
77. Extramiana F, Dubois R, Vaglio M, Roussel P, Dreyfus G, Badilini F, et al. The time course of new T-wave ECG descriptors following single- and double-dose administration of sotalol in healthy subjects. *Annals of noninvasive electrocardiology : the official journal of the International Society for Holter and Noninvasive Electrocardiology, Inc.* 2010;15(1):26-35. Epub 2010/02/12. doi: 10.1111/j.1542-474X.2009.00336.x. PubMed PMID: 20146779.
78. Lau CP, Gbadebo TD, Connolly SJ, Van Gelder IC, Capucci A, Gold MR, et al. Ethnic differences in atrial fibrillation identified using implanted cardiac devices. *Journal of cardiovascular electrophysiology*. 2013;24(4):381-7. Epub 2013/01/30. doi: 10.1111/jce.12066. PubMed PMID: 23356818.
79. Leu HB, Chung CM, Lin SJ, Lu TM, Yang HC, Ho HY, et al. A novel SNP associated with nighttime pulse pressure in young-onset hypertension patients could be a genetic prognostic factor for cardiovascular events in a general cohort in Taiwan. *PloS one*. 2014;9(6):e97919. Epub 2014/06/04. doi: 10.1371/journal.pone.0097919. PubMed PMID: 24892410; PubMed Central PMCID: PMC4043733.
80. Miwa Y, Miyakoshi M, Hoshida K, Yanagisawa R, Abe A, Tsukada T, et al. Heart rate turbulence can predict cardiac mortality following myocardial infarction in patients with diabetes mellitus. *Journal of cardiovascular electrophysiology*. 2011;22(10):1135-40. Epub 2011/05/05. doi: 10.1111/j.1540-8167.2011.02082.x. PubMed PMID: 21539643.
81. Blauw H, van Bon AC, Koops R, DeVries JH. Performance and safety of an integrated bi-hormonal artificial pancreas for fully automated glucose control at home. *Diabetes, obesity & metabolism*. 2016. Epub 2016/03/22. doi: 10.1111/dom.12663. PubMed PMID: 26996542.
82. Kovatchev BP, Renard E, Cobelli C, Zisser HC, Keith-Hynes P, Anderson SM, et al. Safety of outpatient closed-loop control: first randomized crossover trials of a wearable artificial pancreas. *Diabetes care*. 2014;37(7):1789-96. Epub 2014/06/16. doi: 10.2337/dc13-2076. PubMed PMID: 24929429; PubMed Central PMCID: PMC4067397.
83. Kropff J, Del Favero S, Place J, Toffanin C, Visentin R, Monaro M, et al. 2 month evening and night closed-loop glucose control in patients with type 1 diabetes under free-living conditions: a randomised crossover trial. *The lancet Diabetes & endocrinology*. 2015;3(12):939-47. Epub 2015/10/04. doi: 10.1016/s2213-8587(15)00335-6. PubMed PMID: 26432775.
84. Russell SJ, El-Khatib FH, Sinha M, Magyar KL, McKeon K, Goergen LG, et al. Outpatient glycemic control with a bionic pancreas in type 1 diabetes. *The New England journal of medicine*. 2014;371(4):313-25. Epub 2014/06/17. doi: 10.1056/NEJMoa1314474. PubMed PMID: 24931572; PubMed Central PMCID: PMC4183762.
85. Turksoy K, Quinn LT, Littlejohn E, Cinar A. An integrated multivariable artificial pancreas control system. *Journal of diabetes science and technology*. 2014;8(3):498-507. Epub 2014/05/31. doi: 10.1177/1932296814524862. PubMed PMID: 24876613; PubMed Central PMCID: PMC4455451.
86. Renard E, Farret A, Kropff J, Bruttomesso D, Messori M, Place J, et al. Day and Night Closed-Loop Glucose Control in Patients With Type 1 Diabetes Under Free-Living Conditions: Results of a Single-Arm

1-Month Experience Compared With a Previously Reported Feasibility Study of Evening and Night at Home. *Diabetes care*. 2016. Epub 2016/05/22. doi: 10.2337/dc16-0008. PubMed PMID: 27208331.

87. Vasiliadis KV, Viazis N, Vlachogiannakos J, Sgouros SN, Stefanidis G, Archimandritis A, et al. Efficacy of three different dosages of esomeprazole in the long-term management of reflux disease: a prospective, randomized study, using the wireless Bravo pH system. *The American journal of gastroenterology*. 2010;105(2):308-13. Epub 2009/10/08. doi: 10.1038/ajg.2009.556. PubMed PMID: 19809412.

88. Kandulski A, Peitz U, Monkemuller K, Neumann H, Weigt J, Malfertheiner P. GERD assessment including pH metry predicts a high response rate to PPI standard therapy. *BMC gastroenterology*. 2013;13:12. Epub 2013/01/18. doi: 10.1186/1471-230x-13-12. PubMed PMID: 23324360; PubMed Central PMCID: PMC3562521.
