# Supplementary material
Source: publisher figshare collection journal article supplement (https://karger.figshare.com/articles/dataset/_/5841519)
Supplement: Supplementary file 1 [file 1 › 486347sm_7.pdf]

**Supplemental Table    Mobile adherence outcomes**

| Therapeutic Area                   | Technology                             | Position of device                 | Epochs        | Study design         | Type of clinical study | Other mobile outcomes | Other standard outcome assessment | Use of mobile outcomes | Objectives                                                                                                                                                     | Source       |
|------------------------------------|----------------------------------------|------------------------------------|---------------|----------------------|------------------------|-----------------------|-----------------------------------|------------------------|----------------------------------------------------------------------------------------------------------------------------------------------------------------|--------------|
| Reproductive and Peripartum health | Medication adherence monitor (SIMPill) | Not Attached to the Body (Pillbox) | Not specified | Interventional (RCT) | Prevention             | NA                    | Adherence (PRO)                   | Primary endpoint       | To estimate whether women receiving daily text-message reminders have increased oral contraceptive pill adherence compared with women not receiving reminders. | Hou 2010 [1] |

PRO = Patient Reported Outcome

**References**

1. Hou MY, Hurwitz S, Kavanagh E, Fortin J, Goldberg AB. Using daily text-message reminders to improve adherence with oral contraceptives: a randomized controlled trial. *Obstetrics and gynecology*. 2010;116(3):633-40. Epub 2010/08/25. doi: 10.1097/AOG.0b013e3181eb6b0f. PubMed PMID: 20733446.
