# Supplementary material
Source: publisher figshare collection journal article supplement (https://karger.figshare.com/articles/dataset/_/5841519)
Supplement: Supplementary file 1 [file 1 › 486347sm_8.pdf]

**Supplemental Table Mobile cardiac biomarkers**

| Therapeutic Area                                     | Technology                                                                                              | Position of device                            | Epochs        | Study design                 | Type of clinical study | Other mobile outcomes                  | Other standard outcome assessment                                                                        | Use of mobile outcomes | Objectives                                                                                                                                                                                                 | Source              |
|------------------------------------------------------|---------------------------------------------------------------------------------------------------------|-----------------------------------------------|---------------|------------------------------|------------------------|----------------------------------------|----------------------------------------------------------------------------------------------------------|------------------------|------------------------------------------------------------------------------------------------------------------------------------------------------------------------------------------------------------|---------------------|
| Cardiology                                           | Electrocardiograph (12-lead digital ECG Holter)                                                         | Not specified                                 | Not specified | Observational (Cohort study) | Diagnostic             | NA                                     | Cardiometabolic and anthropometric measures (Biomarker)                                                  | Co-Prim Endpoint       | To assess the time course effect of IKr blockade on ECG biomarkers of ventricular repolarization and to evaluate the accuracy of a fully automatic approach for QT duration evaluation.                    | Extramiana 2010 [1] |
| Cardiology (Atrial Fibrillation)                     | Implantable cardioverter defibrillator (specific ICD device not specified)                              | Implanted in chest                            | Not specified | Observational (Cohort study) | Epidemiologic al       | NA                                     | Cardiometabolic and anthropometric measures (ClinRO)<br>Cardiac (ClinRO)<br>General health history (PRO) | Co-Prim Endpoint       | To assess possible ethnic differences in asymptomatic and symptomatic AF occurrence among patients enrolled in the ASSERT clinical trial.                                                                  | Lau 2013 [2]        |
| Cardiology (Heart Failure)                           | Pressure sensor (EverOn)                                                                                | Not Attached to the Body (Under the mattress) | Not specified | Observational (Cohort study) | Prevention             | Sleep (PerFO)<br>Breathing (Biomarker) | Cardiometabolic and anthropometric measures (ClinRO)<br>Cardiac (PRO, ClinRO, and ObsRO)<br>Sleep (PRO)  | Exploratory endpoint   | To assess normal and altered physiological patterns in the home environment, and to determine if altered physiological patterns correlate with hospital readmissions.                                      | Bennett 2015 [3]    |
| Cardiology (Hypertension)                            | Ambulatory blood pressure monitor (specific ABP monitor not specified)                                  | Arm (Upper Left)                              | Not specified | Observational (Cohort study) | Genetic                | NA                                     | Sleep (PRO)                                                                                              | Primary endpoint       | To investigate the genetic impact of pulse pressure-related loci in determining future cardiovascular outcomes, as measured by ambulatory blood pressure monitoring of hypertensive patients.              | Leu 2014 [4]        |
| Cardiology (Myocardial infarction) Diabetes (Type 2) | Electrocardiograph (MARS ECG Holter system)                                                             | Not specified                                 | Not specified | Observational (Case control) | Prevention             | NA                                     | Cardiac (ObsRO)                                                                                          | Exploratory endpoint   | To prospectively assess the utility of heart rate turbulence, measured from 24-hour Holter ECGs, in identifying the risk of cardiac mortality in post-MI patients with diabetes mellitus.                  | Miwa 2011 [5]       |
| Nephrology (Dialysis, Kidney transplant)             | Heart rate monitor (Suunto T3c)<br>Inertial sensor (SenseWear Armband)<br>Location monitor (Suunto T3c) | Chest (HR monitor)<br>Arm (Inertial sensor)   | 5 second      | Observational (Case control) | Epidemiologic al       | Physical activity (PerFO)              | Cardiometabolic and anthropometric measures (Biomarkers)<br>Cardiac (Biomarkers)                         | Co-Prim Endpoint       | To compare the metabolic and hydration status adaptations to 5 repeated trekking sessions in a 7-day expedition into the Algerian desert between kidney transplanted patients and health control subjects. | Mosconi 2011 [6]    |

PerFO = Performance Outcome; ObsRO = Observer Reported Outcome; PRO = Patient Reported Outcome; ClinRO = Clinician Reported Outcome

## References

1. Extramiana F, Dubois R, Vaglio M, Roussel P, Dreyfus G, Badilini F, et al. The time course of new T-wave ECG descriptors following single- and double-dose administration of sotalol in healthy subjects. *Annals of noninvasive electrocardiology : the official journal of the International Society for Holter and Noninvasive Electrocardiology, Inc.* 2010;15(1):26-35. Epub 2010/02/12. doi: 10.1111/j.1542-474X.2009.00336.x. PubMed PMID: 20146779.
2. Lau CP, Gbadebo TD, Connolly SJ, Van Gelder IC, Capucci A, Gold MR, et al. Ethnic differences in atrial fibrillation identified using implanted cardiac devices. *Journal of cardiovascular electrophysiology.* 2013;24(4):381-7. Epub 2013/01/30. doi: 10.1111/jce.12066. PubMed PMID: 23356818.
3. Bennett MK, Shao M, Gorodeski EZ. Home monitoring of heart failure patients at risk for hospital readmission using a novel under-the-mattress piezoelectric sensor: A preliminary single centre experience. *Journal of telemedicine and telecare.* 2015. Epub 2015/12/17. doi: 10.1177/1357633x15618810. PubMed PMID: 26670209.
4. Leu HB, Chung CM, Lin SJ, Lu TM, Yang HC, Ho HY, et al. A novel SNP associated with nighttime pulse pressure in young-onset hypertension patients could be a genetic prognostic factor for cardiovascular events in a general cohort in Taiwan. *PloS one.* 2014;9(6):e97919. Epub 2014/06/04. doi: 10.1371/journal.pone.0097919. PubMed PMID: 24892410; PubMed Central PMCID: PMC4043733.
5. Miwa Y, Miyakoshi M, Hoshida K, Yanagisawa R, Abe A, Tsukada T, et al. Heart rate turbulence can predict cardiac mortality following myocardial infarction in patients with diabetes mellitus. *Journal of cardiovascular electrophysiology.* 2011;22(10):1135-40. Epub 2011/05/05. doi: 10.1111/j.1540-8167.2011.02082.x. PubMed PMID: 21539643.
6. Mosconi G, Colombo D, Graziani E, Franceschelli N, Roi GS, Totti V, et al. Physical performance in kidney transplanted patients: a study on desert trekking. *Journal of biological regulators and homeostatic agents.* 2011;25(3):417-25. Epub 2011/10/26. PubMed PMID: 22023766.
