# Supplementary material
Source: publisher figshare collection journal article supplement (https://karger.figshare.com/articles/dataset/_/5841519)
Supplement: Supplementary file 1 [file 1 › 486347sm_9.pdf]

**Supplemental Table    Mobile glucose biomarkers**

| Therapeutic Area  | Technology                                                                                                         | Position of device                                                     | Epochs        | Study design                 | Type of clinical study | Other mobile outcomes | Other standard outcome assessment | Use of mobile outcomes                                   | Objectives                                                                                                                                                                                                                                                                                                                                                         | Source           |
|-------------------|--------------------------------------------------------------------------------------------------------------------|------------------------------------------------------------------------|---------------|------------------------------|------------------------|-----------------------|-----------------------------------|----------------------------------------------------------|--------------------------------------------------------------------------------------------------------------------------------------------------------------------------------------------------------------------------------------------------------------------------------------------------------------------------------------------------------------------|------------------|
| Diabetes (Type 1) | Continuous glucose monitor (AccuChek Spirit Combo insulin pump, Aviva Combo glucose-meter, Dexcom G4 Platinum CGM) | Not specified                                                          | Not specified | Interventional (RCT)         | Treatment (Phase III)  | NA                    | Glucose (Biomarker, PRO)          | Primary endpoint<br>Secondary endpoint<br>Safety outcome | To assess glucose control achieved with an artificial pancreas (AP) used during the evening and night and patient managed open-loop control with use of sensor augmented pump (SAP) therapy during the day (AP period), versus continuous SAP therapy (control period), in free-living conditions in a study of sufficient duration to assess the effect on HbA1c. | Kropff 2015 [1]  |
| Diabetes (Type 1) | Continuous glucose monitor (Dexcom G4 Platinum CGM)                                                                | Not specified                                                          | Not specified | Observational (Case control) | Expanded access        | NA                    | Glucose (Biomarkers, PRO)         | Secondary endpoint<br>Safety outcome                     | To assess the efficacy of glucose control achieved by day-and-night artificial pancreas use for one month under free-living conditions.                                                                                                                                                                                                                            | Renard 2016 [2]  |
| Diabetes (Type 1) | Continuous glucose monitor (Dexcom G4 Platinum CGM, Tandem Diabetes Care insulin pump)                             | Not specified                                                          | Not specified | Interventional (RCT)         | Treatment (Phase III)  | NA                    | Glucose (Biomarkers, PRO)         | Co-Prim Endpoint<br>Secondary endpoint                   | To test the safety and effectiveness of autonomous, wearable, bihormonal, bionic pancreas in two 5-day trials in with adults and adolescents in two distinct outpatient settings that minimally constrain patients' behavior but allow close observation for risk mitigation and high-density data collection.                                                     | Russell 2014 [3] |
| Diabetes (Type 1) | Continuous glucose monitor (Guardian REAL-time CGM, iPro CGM)<br><br>Inertial sensor (SenseWear Armband)           | Abdomen (Above the waist),<br><br>Arm (Dominant Upper Arm over tricep) | Not specified | Interventional (RCT)         | Prevention             | NA                    | Glucose (Biomarkers)              | Co-Prim Endpoint                                         | To develop a closed-loop artificial pancreas control system that uses continuous measurements of glucose concentration and physiological variables, integrated with a hypoglycemia early alarm module to regulate glucose concentration and prevent hypoglycemia.                                                                                                  | Turksoy 2014 [4] |
| Diabetes (Type 1) | Continuous glucose monitor (Inreda Diabetic BV)                                                                    | Abdomen                                                                | Not specified | Interventional (RCT)         | Treatment (Phase II)   | NA                    | Glucose (PRO, Biomarker)          | Primary endpoint                                         | To determine if an integrated bihormonal artificial pancreas in adults with type 1 diabetes during short-term daily use at home (i) provides better glucose control than standard insulin pump therapy and (ii) provides treatment that is at least as safe as standard                                                                                            | Blauw 2016 [5]   |

|                   |                                                                |               |               |                      |            |    |                     |                                        |                                                                                                                                                                                           |                    |
|-------------------|----------------------------------------------------------------|---------------|---------------|----------------------|------------|----|---------------------|----------------------------------------|-------------------------------------------------------------------------------------------------------------------------------------------------------------------------------------------|--------------------|
| Diabetes (Type 1) | Continuous glucose monitor (Tandem Diabetes Care insulin pump) | Not specified | Not specified | Interventional (RCT) | Prevention | NA | Glucose (Biomarker) | Primary endpoint<br>Secondary endpoint | therapy<br><br>To estimate the effect size of hypoglycemia risk reduction on closed-loop control versus open-loop sensor-augmented insulin pump therapy in supervised outpatient setting. | Kovatchev 2014 [6] |
|-------------------|----------------------------------------------------------------|---------------|---------------|----------------------|------------|----|---------------------|----------------------------------------|-------------------------------------------------------------------------------------------------------------------------------------------------------------------------------------------|--------------------|

PRO = Patient Reported Outcome

## References

1. Kropff J, Del Favero S, Place J, Toffanin C, Visentin R, Monaro M, et al. 2 month evening and night closed-loop glucose control in patients with type 1 diabetes under free-living conditions: a randomised crossover trial. *The lancet Diabetes & endocrinology*. 2015;3(12):939-47. Epub 2015/10/04. doi: 10.1016/s2213-8587(15)00335-6. PubMed PMID: 26432775.
2. Renard E, Farret A, Kropff J, Bruttomesso D, Messori M, Place J, et al. Day and Night Closed-Loop Glucose Control in Patients With Type 1 Diabetes Under Free-Living Conditions: Results of a Single-Arm 1-Month Experience Compared With a Previously Reported Feasibility Study of Evening and Night at Home. *Diabetes care*. 2016. Epub 2016/05/22. doi: 10.2337/dc16-0008. PubMed PMID: 27208331.
3. Russell SJ, El-Khatib FH, Sinha M, Magyar KL, McKeon K, Goergen LG, et al. Outpatient glycemic control with a bionic pancreas in type 1 diabetes. *The New England journal of medicine*. 2014;371(4):313-25. Epub 2014/06/17. doi: 10.1056/NEJMoa1314474. PubMed PMID: 24931572; PubMed Central PMCID: PMC4183762.
4. Turksoy K, Quinn LT, Littlejohn E, Cinar A. An integrated multivariable artificial pancreas control system. *Journal of diabetes science and technology*. 2014;8(3):498-507. Epub 2014/05/31. doi: 10.1177/1932296814524862. PubMed PMID: 24876613; PubMed Central PMCID: PMC4455451.
5. Blauw H, van Bon AC, Koops R, DeVries JH. Performance and safety of an integrated bihormonal artificial pancreas for fully automated glucose control at home. *Diabetes, obesity & metabolism*. 2016. Epub 2016/03/22. doi: 10.1111/dom.12663. PubMed PMID: 26996542.
6. Kovatchev BP, Renard E, Cobelli C, Zisser HC, Keith-Hynes P, Anderson SM, et al. Safety of outpatient closed-loop control: first randomized crossover trials of a wearable artificial pancreas. *Diabetes care*. 2014;37(7):1789-96. Epub 2014/06/16. doi: 10.2337/dc13-2076. PubMed PMID: 24929429; PubMed Central PMCID: PMC4067397.
