# Supplementary material
Source: publisher figshare collection journal article supplement (https://karger.figshare.com/articles/dataset/_/5841519)
Supplement: Supplementary file 1 [file 1 › 486347sm_11.pdf]

**Supplemental Table     Mobile head-related injury intensity biomarkers**

| Therapeutic Area         | Technology                                | Position of device         | Epochs  | Study design                 | Type of clinical study | Other mobile outcomes | Other standard outcome assessment | Use of mobile outcomes | Objectives                                                                                                                                                  | Source        |
|--------------------------|-------------------------------------------|----------------------------|---------|------------------------------|------------------------|-----------------------|-----------------------------------|------------------------|-------------------------------------------------------------------------------------------------------------------------------------------------------------|---------------|
| Neurology (Head impacts) | Inertial sensor (X2Biosystems Mouthguard) | Head (Fitted in the mouth) | 1000 Hz | Observational (Cohort study) | Epidemiological        | NA                    | NA                                | Primary endpoint       | To quantify head impacts via instrumented mouthguard acceleration analyses for amateur rugby union players over a premier season of matches in New Zealand. | King 2015 [1] |

**References**

1.        King D, Hume PA, Brughelli M, Gissane C. Instrumented mouthguard acceleration analyses for head impacts in amateur rugby union players over a season of matches. The American journal of sports medicine. 2015;43(3):614-24. Epub 2014/12/24. doi: 10.1177/0363546514560876. PubMed PMID: 25535096.
